# Supplementary material for: Decoupling Environment-Dependent and Independent Genetic Robustness across Bacterial Species
Source: PubMed Central journal article supplement (PMC2829043; doi:10.1371/journal.pcbi.1000690), 2010-02-26
Supplement: pcbi.1000690.s004.pdf [file pcbi.1000690.s004.pdf]

| <b>KEGG #</b> | <b>Description</b>                                               |
|---------------|------------------------------------------------------------------|
| C00037        | Glycine                                                          |
| C00041        | L-Alanine                                                        |
| C00183        | L-Valine                                                         |
| C00123        | L-Leucine                                                        |
| C00407        | L-Isoleucine                                                     |
| C00065        | L-Serine                                                         |
| C00188        | L-Threonine                                                      |
| C00079        | L-Phenylalanine                                                  |
| C00082        | L-Tyrosine                                                       |
| C00078        | L-Tryptophan                                                     |
| C00097        | L-Cysteine                                                       |
| C00073        | L-Methionine                                                     |
| C00047        | L-Lysine                                                         |
| C00062        | L-Arginine                                                       |
| C00135        | L-Histidine                                                      |
| C00049        | L-Aspartate                                                      |
| C00025        | L-Glutamate                                                      |
| C00152        | L-Asparagine                                                     |
| C00064        | L-Glutamine                                                      |
| C00148        | L-Proline                                                        |
| C00020        | AMP                                                              |
| C00360        | dAMP                                                             |
| C00131        | dATP                                                             |
| C00002        | ATP                                                              |
| C00144        | GMP                                                              |
| C00362        | dGMP                                                             |
| C00286        | dGTP                                                             |
| C00044        | GTP                                                              |
| C00239        | dCMP                                                             |
| C00055        | CMP                                                              |
| C00458        | dCTP                                                             |
| C00063        | CTP                                                              |
| C00364        | dTMP                                                             |
| C00459        | dTTP                                                             |
| C00105        | UMP                                                              |
| C00075        | UTP                                                              |
| C06040        | Diglucoyl-diacylglycerol                                         |
| C00116        | Glycerol                                                         |
| C05980        | Cardiolipin                                                      |
| C00350        | Phosphatidylethanolamine                                         |
| C00641        | 1,2-Diacyl-sn-glycerol                                           |
| C16221        | (2E)-Octadecenoyl-[acp]                                          |
| C00249        | Hexadecanoic acid                                                |
| C05764        | Hexadecanoyl-[acp]                                               |
| C05890        | Undecaprenyl-diphospho-N-acetylmuramoyl-(N-acetylglucosamine)-L- |
| C05894        | Undecaprenyl-diphospho-N-acetylmuramoyl-(N-acetylglucosamine)-L- |
| C05899        | Undecaprenyl-diphospho-N-acetylmuramoyl-(N-acetylglucosamine)-L- |
| C00234        | 10-Formyltetrahydrofolate                                        |
| C00003        | NAD+                                                             |
| C00004        | NADH                                                             |

|        |                              |
|--------|------------------------------|
| C00006 | NADP+                        |
| C00005 | NADPH                        |
| C00008 | ADP                          |
| C00035 | GDP                          |
| C00112 | CDP                          |
| C00015 | UDP                          |
| C00043 | UDP-N-acetyl-D-glucosamine   |
| C00748 | Siroheme                     |
| C01050 | UDP-N-acetylmuramate         |
| C00054 | Adenosine 3',5'-bisphosphate |
| C00024 | Acetyl-CoA                   |
| C00016 | FAD                          |
| C15672 | Heme O                       |
| C00399 | Ubiquinone                   |
| C00255 | Riboflavin                   |
| C02839 | L-Tyrosyl-tRNA(Tyr)          |
| C00886 | L-Alanyl-tRNA                |
| C02163 | L-Arginyl-tRNA(Arg)          |
| C03402 | L-Asparaginyl-tRNA(Asn)      |
| C03125 | L-Cysteinyl-tRNA(Cys)        |
| C02282 | Glutaminyl-tRNA              |
| C02412 | Glycyl-tRNA(Gly)             |
| C03127 | L-Isoleucyl-tRNA(Ile)        |
| C02047 | L-Leucyl-tRNA                |
| C01931 | L-Lysyl-tRNA                 |
| C02430 | L-Methionyl-tRNA             |
| C03511 | L-Phenylalanyl-tRNA(Phe)     |
| C02702 | L-Prolyl-tRNA(Pro)           |
| C02553 | L-Seryl-tRNA(Ser)            |
| C02992 | L-Threonyl-tRNA(Thr)         |
| C03512 | L-Tryptophanyl-tRNA(Trp)     |
| C02554 | L-Valyl-tRNA(Val)            |
| C02984 | L-Aspartyl-tRNA(Asp)         |
| C02987 | L-Glutamyl-tRNA(Glu)         |
| C00039 | DNA                          |
| C00046 | RNA                          |
