# Supplementary material for: Decoupling Environment-Dependent and Independent Genetic Robustness across Bacterial Species
Source: PubMed Central journal article supplement (PMC2829043; doi:10.1371/journal.pcbi.1000690), 2010-02-26
Supplement: pcbi.1000690.s005.pdf [file pcbi.1000690.s005.pdf]

| species | Respiratory Essentiality | Essentiality of reaction 1.3.1.12 |
|---------|--------------------------|-----------------------------------|
| aav     | Aerobic                  | 1                                 |
| aba     | unknown                  | 1                                 |
| ade     | Facultative              | 1                                 |
| aha     | Facultative              | 1                                 |
| ajs     | Aerobic                  | 0                                 |
| baa     | Facultative              | 1                                 |
| bam     | Facultative              | 1                                 |
| ban     | Facultative              | 1                                 |
| bar     | Facultative              | 1                                 |
| bat     | Facultative              | 1                                 |
| bba     | Aerobic                  | 0                                 |
| bca     | Aerobic                  | 1                                 |
| bce     | Aerobic                  | 1                                 |
| bch     | unknown                  | 1                                 |
| bcn     | unknown                  | 1                                 |
| bcz     | Aerobic                  | 1                                 |
| bma     | unknown                  | 1                                 |
| bml     | unknown                  | 1                                 |
| bmh     | unknown                  | 1                                 |
| bmv     | unknown                  | 1                                 |
| bpd     | Aerobic                  | 1                                 |
| bpl     | Aerobic                  | 1                                 |
| bpm     | Aerobic                  | 1                                 |
| bps     | Aerobic                  | 1                                 |
| bte     | Aerobic                  | 1                                 |
| btk     | Facultative              | 1                                 |
| btl     | Facultative              | 1                                 |
| bur     | Facultative              | 1                                 |
| bvi     | Facultative              | 1                                 |
| bxe     | Aerobic                  | 1                                 |
| ccr     | Aerobic                  | 1                                 |
| chu     | Aerobic                  | 1                                 |
| cps     | Facultative              | 1                                 |
| cvi     | Facultative              | 1                                 |
| eli     | Aerobic                  | 1                                 |
| fps     | Aerobic                  | 0                                 |
| gfo     | Aerobic                  | 1                                 |
| hch     | Facultative              | 0                                 |
| hne     | Aerobic                  | 1                                 |
| ilo     | Aerobic                  | 1                                 |
| mlo     | Aerobic                  | 1                                 |
| mmr     | Facultative              | 1                                 |
| mxh     | Aerobic                  | 1                                 |
| nar     | Aerobic                  | 1                                 |
| nfa     | Aerobic                  | 1                                 |
| pae     | Aerobic                  | 1                                 |

|     |             |          |   |
|-----|-------------|----------|---|
| pat | Aerobic     | 1        | 1 |
| pau | Aerobic     | 0.285714 | 0 |
| pcr | unknown     | 0.5      | 1 |
| pen | unknown     | 1        | 1 |
| pfl | Aerobic     | 1        | 1 |
| pfo | Aerobic     | 1        | 1 |
| pha | Aerobic     | 1        | 1 |
| pmy | Aerobic     | 0        | 0 |
| pna | Aerobic     | 0        | 0 |
| pol | Aerobic     | 1        | 1 |
| ppf | Aerobic     | 0        | 0 |
| ppr | Facultative | 1        | 1 |
| ppu | Aerobic     | 1        | 1 |
| prw | Aerobic     | 0        | 0 |
| psb | Aerobic     | 1        | 1 |
| psp | Aerobic     | 1        | 1 |
| pst | Aerobic     | 1        | 1 |
| reh | Facultative | 1        | 1 |
| ret | Aerobic     | 1        | 1 |
| reu | Facultative | 1        | 1 |
| rle | Aerobic     | 1        | 1 |
| rme | Facultative | 1        | 1 |
| rso | Aerobic     | 1        | 1 |
| sal | Aerobic     | 1        | 1 |
| saz | Facultative | 1        | 1 |
| sbl | Facultative | 1        | 1 |
| sbm | Facultative | 0.5      | 0 |
| scl | Aerobic     | 0.5      | 0 |
| sdn | Facultative | 1        | 1 |
| sfr | Facultative | 1        | 1 |
| she | Facultative | 1        | 1 |
| shm | Facultative | 1        | 1 |
| shn | Facultative | 1        | 1 |
| shw | Facultative | 1        | 1 |
| slo | Facultative | 1        | 1 |
| son | Facultative | 1        | 1 |
| spc | Facultative | 1        | 1 |
| spl | Facultative | 0        | 0 |
| sru | Aerobic     | 1        | 1 |
| sse | Facultative | 0        | 0 |
| vch | Facultative | 1        | 1 |
| vco | Facultative | 0        | 0 |
| vei | unknown     | 0.25     | 1 |
| vpa | Facultative | 1        | 1 |
| vvu | Facultative | 1        | 1 |
| vyv | Facultative | 1        | 1 |
| xac | Aerobic     | 1        | 1 |

|     |         |   |   |
|-----|---------|---|---|
| xcb | Aerobic | 1 | 1 |
| xcc | Aerobic | 1 | 1 |
| xcv | Aerobic | 1 | 1 |
| xom | Aerobic | 1 | 1 |
| xoo | Aerobic | 1 | 1 |
