# Supplementary material for: Decoupling Environment-Dependent and Independent Genetic Robustness across Bacterial Species
Source: PLoS Comput Biol. 2010 Feb 26;6(2):e1000690. doi: 10.1371/journal.pcbi.1000690 (PMC2829043; doi:10.1371/journal.pcbi.1000690)
Supplement: Table S2 — Levels of evolutionary conservation (phylogenetic/phyletic distributions) and essentiality of reactions across species and environments. (0.35 MB XLS) [file pcbi.1000690.s003.xls]

## Sheet: general_enz_essentiality
ec	reaction	phylogenetic-deistribution	mean_essentiality	sd_essentiality	se-essentiality
1.1.1.158	UDP-N-acetylmuramate_dehydrogenase;	359	0	0	0
1.3.1.38	trans-2-enoyl-CoA_reductase_(NADPH);	1	0	NA	NA
2.3.1.85	fatty-acid_synthase;	3	0	0	0
2.4.1.-	no_name	301	0	0	0
2.5.1.-	no_name	375	0	0	0
2.7.1.74	deoxycytidine_kinase;	1	0	NA	NA
2.7.7.2	FAD_synthetase;	421	0	0	0
2.7.8.-	no_name	353	0	0	0
4.2.1.20	tryptophan_synthase;	366	0	0	0
4.99.1.4	sirohydrochlorin_ferrochelatase;	61	0	0	0
6.1.1.1	tyrosine---tRNA_ligase	434	0	0	0
6.1.1.11	serine---tRNA_ligase;	427	0	0	0
6.1.1.14	glycine---tRNA_ligase;	474	0	0	0
6.1.1.15	proline---tRNA_ligase;	420	0	0	0
6.1.1.16	cysteine---tRNA_ligase;	456	0	0	0
6.1.1.17	glutamate---tRNA_ligase;	398	0	0	0
6.1.1.2	tryptophan---tRNA_ligase;	366	0	0	0
6.1.1.20	phenylalanine---tRNA_ligase;	455	0	0	0
6.1.1.3	threonine---tRNA_ligase;	365	0	0	0
6.1.1.4	leucine---tRNA_ligase;	408	0	0	0
6.1.1.5	isoleucine---tRNA_ligase;	343	0	0	0
6.1.1.6	lysine---tRNA_ligase;	425	0	0	0
6.1.1.9	valine---tRNA_ligase;	411	0	0	0
2.1.1.64	3-demethylubiquinone-9_3-O-methyltransferase;	208	0.00480769	0.0693375	0.00480769
6.1.1.12	aspartate---tRNA_ligase;	99	0.020202	0.141407	0.0142119
1.14.13.-	no_name	213	0.0234742	0.151761	0.0103985
1.3.1.76	precorrin-2_dehydrogenase;	58	0.0273219	0.0567105	0.00744646
2.1.1.-	no_name	212	0.0283019	0.166226	0.0114165
2.1.1.107	uroporphyrinogen-III_C-methyltransferase;	58	0.0291552	0.0591442	0.00776601
2.5.1.9	riboflavin_synthase;	401	0.0382222	0.143796	0.00718084
4.99.1.1	ferrochelatase;	336	0.0486654	0.106114	0.00578898
6.1.1.10	methionine---tRNA_ligase;	448	0.0513393	0.220936	0.0104382
2.7.8.7	holo-[acyl-carrier-protein]_synthase;	378	0.0598573	0.23424	0.012048
6.2.1.3	long-chain-fatty-acid---CoA_ligase;	305	0.0606557	0.237364	0.0135914
2.7.1.26	riboflavin_kinase;	430	0.0633568	0.225891	0.0108934
2.4.2.18	anthranilate_phosphoribosyltransferase;	343	0.0666845	0.139575	0.00753636
5.3.1.24	phosphoribosylanthranilate_isomerase;	343	0.0666845	0.139575	0.00753636
4.1.1.65	phosphatidylserine_decarboxylase;	325	0.0921705	0.222936	0.0123663
4.1.1.48	indole-3-glycerol-phosphate_synthase;	356	0.100766	0.22249	0.0117919
4.1.3.27	anthranilate_synthase;	338	0.106227	0.1864	0.0101388
6.3.1.2	glutamate---ammonia_ligase;	427	0.111115	0.310909	0.0150459
3.1.2.14	oleoyl-[acyl-carrier-protein]_hydrolase;	43	0.13567	0.317211	0.0483742
4.2.1.9	dihydroxy-acid_dehydratase;	374	0.140103	0.214426	0.0110877
6.3.5.1	NAD+_synthase_(glutamine-hydrolysing);	323	0.155221	0.307298	0.0170985
2.6.1.42	branched-chain-amino-acid_transaminase;	405	0.167313	0.365788	0.0181762
1.1.1.86	ketol-acid_reductoisomerase;	369	0.170718	0.246907	0.0128535
2.8.2.1	aryl_sulfotransferase;	9	0.174603	0.362656	0.120885
2.4.1.157	1,2-diacylglycerol_3-glucosyltransferase;	44	0.197955	0.262982	0.039646
2.2.1.6	acetolactate_synthase;	383	0.201032	0.288118	0.0147221
2.5.1.61	hydroxymethylbilane_synthase;	165	0.213498	0.25952	0.0202036
4.2.1.24	porphobilinogen_synthase;	165	0.213498	0.25952	0.0202036
4.2.1.75	uroporphyrinogen-III_synthase;	165	0.213498	0.25952	0.0202036
2.7.4.14	cytidylate_kinase;	450	0.221968	0.375966	0.0177232
5.4.3.8	glutamate-1-semialdehyde_2,1-aminomutase;	164	0.223083	0.27685	0.0216183
1.2.1.70	glutamyl-tRNA_reductase	159	0.234646	0.272233	0.0215895
1.3.3.4	protoporphyrinogen_oxidase;	160	0.24214	0.267944	0.0211829
3.1.3.27	phosphatidylglycerophosphatase;	158	0.244024	0.240668	0.0191465
2.7.8.5	CDP-diacylglycerol-glycerol-3-phosphate_3-phosphatidyltransferase;	155	0.244999	0.236941	0.0190315
2.6.1.83	LL-diaminopimelate_aminotransferase;	18	0.251852	0.388431	0.0915541
2.5.1.3	thiamine-phosphate_diphosphorylase;	298	0.251941	0.329595	0.0190929
4.1.1.37	uroporphyrinogen_decarboxylase;	157	0.25391	0.271134	0.0216388
2.3.1.157	glucosamine-1-phosphate_N-acetyltransferase	279	0.266993	0.355631	0.0212911
2.7.4.7	phosphomethylpyrimidine_kinase;	272	0.268938	0.321552	0.0194969
2.7.4.16	thiamine-phosphate_kinase;	298	0.269363	0.348155	0.0201681
1.3.1.9	enoyl-[acyl-carrier-protein]_reductase_(NADH);	271	0.269373	0.444455	0.0269987
4.2.1.51	prephenate_dehydratase;	345	0.278745	0.325094	0.0175025
5.4.2.10	phosphoglucosamine_mutase	259	0.281936	0.349352	0.0217077
6.1.1.7	alanine---tRNA_ligase;	407	0.287469	0.453139	0.0224613
3.1.4.3	phospholipase_C;	84	0.30014	0.35771	0.0390294
6.3.2.4	D-alanine---D-alanine_ligase;	408	0.338363	0.454255	0.022489
6.3.2.10	UDP-N-acetylmuramoyl-tripeptide---D-alanyl-D-alanine_ligase;	412	0.339744	0.455112	0.0224217
2.4.1.227	undecaprenyldiphospho-muramoylpentapeptide	454	0.358757	0.465782	0.0218602
1.3.1.12	prephenate_dehydrogenase;	355	0.363738	0.445124	0.0236247
2.5.1.7	UDP-N-acetylglucosamine_1-carboxyvinyltransferase;	425	0.367595	0.430545	0.0208845
3.5.1.15	aspartoacylase;	17	0.367647	0.400801	0.0972085
2.3.1.-	no_name	422	0.371926	0.471704	0.0229622
4.2.1.-	no_name	381	0.375141	0.484616	0.0248276
2.7.8.13	phospho-N-acetylmuramoyl-pentapeptide-transferase;	449	0.394153	0.472289	0.0222887
3.1.1.3	triacylglycerol_lipase;	127	0.39806	0.485001	0.0430369
2.7.4.3	adenylate_kinase;	462	0.406237	0.484132	0.0225239
3.5.4.9	methenyltetrahydrofolate_cyclohydrolase;	415	0.433735	0.496188	0.0243569
1.1.1.1	alcohol_dehydrogenase;	325	0.458334	0.459489	0.0254879
2.7.7.23	UDP-N-acetylglucosamine_diphosphorylase;	394	0.465713	0.447196	0.0225294
2.7.1.49	hydroxymethylpyrimidine_kinase;	133	0.492002	0.268521	0.0232837
1.5.1.2	pyrroline-5-carboxylate_reductase;	424	0.510937	0.476662	0.0231487
6.3.2.13	UDP-N-acetylmuramoyl-L-alanyl-D-glutamate---2,6-diaminopimelate	404	0.511744	0.481527	0.0239569
2.3.1.86	fatty-acyl-CoA_synthase;	116	0.530692	0.402381	0.0373601
6.1.1.18	glutamine---tRNA_ligase;	192	0.531187	0.500269	0.0361038
1.4.1.1	alanine_dehydrogenase;	196	0.536812	0.47909	0.0342207
3.5.1.18	succinyl-diaminopimelate_desuccinylase;	262	0.53948	0.405919	0.0250778
3.1.4.14	[acyl-carrier-protein]_phosphodiesterase;	65	0.555797	0.384116	0.0476437
5.1.1.1	alanine_racemase;	402	0.558918	0.478062	0.0238436
1.3.99.22	coproporphyrinogen_dehydrogenase;	150	0.560526	0.448324	0.0366055
3.1.3.4	phosphatidate_phosphatase;	4	0.5625	0.515388	0.257694
1.1.1.23	histidinol_dehydrogenase;	383	0.565258	0.47189	0.0241125
4.2.3.1	threonine_synthase;	392	0.576531	0.49474	0.0249881
2.7.1.39	homoserine_kinase;	342	0.591087	0.479949	0.0259527
2.5.1.2	thiamine_pyridinylase;	5	0.6	0.547723	0.244949
1.1.1.49	glucose-6-phosphate_dehydrogenase;	296	0.600831	0.481742	0.0280007
2.7.6.2	thiamine_diphosphokinase;	67	0.60672	0.453501	0.055404
5.1.1.7	diaminopimelate_epimerase	369	0.610298	0.405979	0.0211344
2.3.1.20	diacylglycerol_O-acyltransferase;	2	0.615385	0.543928	0.384615
2.5.1.48	cystathionine_gamma-synthase;	259	0.616202	0.395842	0.0245964
2.7.1.50	hydroxyethylthiazole_kinase;	67	0.618823	0.311428	0.0380469
2.7.4.8	guanylate_kinase;	477	0.620475	0.484409	0.0221796
2.6.1.-	no_name	300	0.626066	0.436284	0.0251889
1.5.1.12	1-pyrroline-5-carboxylate_dehydrogenase;	272	0.645108	0.42074	0.0255111
2.7.8.8	CDP-diacylglycerol---serine_O-phosphatidyltransferase;	311	0.654015	0.402027	0.0227968
1.3.1.26	dihydrodipicolinate_reductase;	175	0.658247	0.360625	0.0272607
4.2.1.52	dihydrodipicolinate_synthase;	175	0.658247	0.360625	0.0272607
2.7.7.41	phosphatidate_cytidylyltransferase;	349	0.66378	0.406993	0.0217858
4.1.1.12	aspartate_4-decarboxylase;	3	0.666667	0.57735	0.333333
2.3.1.31	homoserine_O-acetyltransferase;	215	0.667315	0.406263	0.0277069
2.3.1.117	2,3,4,5-tetrahydropyridine-2,6-dicarboxylate_N-succinyltransferase;	139	0.678651	0.338472	0.0287088
2.1.2.1	glycine_hydroxymethyltransferase;	478	0.685874	0.445539	0.0203785
4.1.2.13	fructose-bisphosphate_aldolase;	459	0.691427	0.424216	0.0198007
2.6.1.17	succinyldiaminopimelate_transaminase;	149	0.700218	0.336648	0.0275792
5.1.3.8	N-acylglucosamine_2-epimerase;	9	0.718519	0.443193	0.147731
2.7.4.6	nucleoside-diphosphate_kinase;	432	0.722685	0.445912	0.0214539
1.3.1.10	enoyl-[acyl-carrier-protein]_reductase_(NADPH,_B-specific);	66	0.727273	0.448775	0.0552403
4.2.1.19	imidazoleglycerol-phosphate_dehydratase;	154	0.734459	0.369189	0.0297501
2.7.1.23	NAD+_kinase;	387	0.735237	0.431569	0.0219379
3.5.1.1	asparaginase;	327	0.736578	0.435876	0.024104
3.1.3.15	histidinol-phosphatase;	173	0.740487	0.374109	0.028443
2.6.1.5	tyrosine_transaminase;	4	0.75	0.5	0.25
3.6.1.14	adenosine-tetraphosphatase	4	0.75	0.5	0.25
1.5.1.5	methylenetetrahydrofolate_dehydrogenase_(NADP+);	415	0.760224	0.415418	0.0203921
4.4.1.16	selenocysteine_lyase;	235	0.761926	0.42208	0.0275334
2.6.1.1	aspartate_transaminase;	413	0.76317	0.411108	0.0202293
3.5.1.47	N-acetyldiaminopimelate_deacetylase;	24	0.764684	0.20063	0.0409534
2.7.1.69	protein-Npi-phosphohistidine---sugar_phosphotransferase;	346	0.773389	0.403935	0.0217157
3.4.11.5	prolyl_aminopeptidase;	202	0.774257	0.407879	0.0286983
1.1.1.100	3-oxoacyl-[acyl-carrier-protein]_reductase;	389	0.77635	0.417227	0.0211543
2.1.1.14	5-methyltetrahydropteroyltriglutamate---homocysteine	277	0.781635	0.337896	0.0203022
4.1.2.5	threonine_aldolase;	224	0.787063	0.366731	0.0245032
4.2.3.5	chorismate_synthase;	376	0.787398	0.365259	0.0188368
2.7.2.-	no_name	7	0.795168	0.376473	0.142293
1.4.1.9	leucine_dehydrogenase;	87	0.804598	0.398809	0.0427568
4.3.2.1	argininosuccinate_lyase;	374	0.804813	0.396876	0.020522
4.1.1.20	diaminopimelate_decarboxylase;	387	0.807449	0.31569	0.0160474
2.7.1.71	shikimate_kinase;	363	0.808822	0.347019	0.0182138
1.8.1.2	sulfite_reductase_(NADPH);	189	0.809184	0.351546	0.0255712
2.5.1.19	3-phosphoshikimate_1-carboxyvinyltransferase;	364	0.809347	0.346686	0.0181713
2.6.1.21	D-amino-acid_transaminase;	113	0.811643	0.363475	0.0341929
3.1.1.23	acylglycerol_lipase;	12	0.816964	0.345771	0.0998154
6.3.4.5	argininosuccinate_synthase;	399	0.817043	0.387117	0.0193801
6.1.1.19	arginine---tRNA_ligase;	403	0.818859	0.385614	0.0192088
2.1.3.3	ornithine_carbamoyltransferase;	408	0.821078	0.383757	0.0189988
1.3.1.43	arogenate_dehydrogenase;	19	0.824561	0.374634	0.085947
2.3.1.46	homoserine_O-succinyltransferase;	152	0.82644	0.299861	0.024322
1.1.1.25	shikimate_dehydrogenase;	355	0.828204	0.334637	0.0177607
1.1.1.3	homoserine_dehydrogenase;	357	0.828419	0.308083	0.0163055
4.2.1.3	aconitate_hydratase;	380	0.831766	0.320098	0.0164207
4.4.1.1	cystathionine_gamma-lyase;	59	0.840655	0.338542	0.0440744
2.8.2.2	alcohol_sulfotransferase;	1	0.842105	NA	NA
4.3.1.3	histidine_ammonia-lyase;	214	0.842236	0.270267	0.0184751
1.1.1.42	isocitrate_dehydrogenase_(NADP+);	307	0.847032	0.311405	0.0177728
2.6.1.9	histidinol-phosphate_transaminase;	362	0.848361	0.321823	0.0169147
3.5.1.-	no_name	389	0.850386	0.31628	0.016036
2.7.4.9	dTMP_kinase;	461	0.854875	0.350879	0.0163421
1.4.3.2	L-amino-acid_oxidase;	7	0.857143	0.377964	0.142857
1.14.16.1	phenylalanine_4-monooxygenase;	98	0.857507	0.334185	0.0337577
4.2.3.4	3-dehydroquinate_synthase;	353	0.85903	0.298281	0.0158759
3.1.3.-	no_name	200	0.859048	0.319251	0.0225744
4.2.1.10	3-dehydroquinate_dehydratase;	355	0.859825	0.297625	0.0157963
2.5.1.54	3-deoxy-7-phosphoheptulonate_synthase;	347	0.861156	0.293354	0.0157481
6.3.5.5	carbamoyl-phosphate_synthase_(glutamine-hydrolysing);	422	0.861216	0.343678	0.01673
2.3.1.30	serine_O-acetyltransferase;	383	0.862312	0.322995	0.0165043
2.5.1.47	cysteine_synthase;	393	0.868048	0.334107	0.0168535
4.2.1.33	3-isopropylmalate_dehydratase;	363	0.869035	0.312477	0.0164008
1.1.1.85	3-isopropylmalate_dehydrogenase;	364	0.869394	0.312122	0.0163596
3.2.1.3	glucan_1,4-alpha-glucosidase;	23	0.869565	0.34435	0.071802
1.1.1.6	glycerol_dehydrogenase;	90	0.87037	0.334061	0.0352131
5.4.99.5	chorismate_mutase;	321	0.870715	0.244113	0.0136251
2.2.1.1	transketolase;	441	0.872738	0.293665	0.013984
3.5.99.2	thiaminase;	1	0.875	NA	NA
4.2.1.91	arogenate_dehydratase;	8	0.875	0.353553	0.125
3.4.13.3	Xaa-His_dipeptidase;	141	0.875858	0.314713	0.0265036
2.3.3.1	citrate_(Si)-synthase;	367	0.879244	0.296623	0.0154836
6.1.1.24	glutamate---tRNAGln_ligase;	11	0.879362	0.066423	0.0200273
6.3.3.2	5-formyltetrahydrofolate_cyclo-ligase;	210	0.880952	0.320912	0.0221451
6.4.1.2	acetyl-CoA_carboxylase;	400	0.88206	0.282085	0.0141042
3.1.3.2	acid_phosphatase;	164	0.882412	0.289988	0.0226443
3.1.3.3	phosphoserine_phosphatase	298	0.883315	0.313901	0.0181838
2.7.7.6	DNA-directed_RNA_polymerase;	468	0.883903	0.319383	0.0147635
2.6.1.57	aromatic-amino-acid_transaminase;	130	0.884375	0.320646	0.0281225
6.3.4.3	formate---tetrahydrofolate_ligase;	169	0.887574	0.316829	0.0243714
2.3.1.1	amino-acid_N-acetyltransferase;	299	0.887804	0.31386	0.018151
3.5.1.38	glutamin-(asparagin-)ase	18	0.888889	0.323381	0.0762216
3.5.1.9	arylformamidase;	9	0.888889	0.333333	0.111111
1.2.1.38	N-acetyl-gamma-glutamyl-phosphate_reductase;	316	0.88959	0.311589	0.0175283
2.7.2.8	acetylglutamate_kinase;	316	0.88959	0.311589	0.0175283
3.2.1.23	beta-galactosidase;	132	0.890152	0.310837	0.0270549
2.6.1.11	acetylornithine_transaminase;	321	0.89131	0.309448	0.0172717
2.7.7.7	DNA-directed_DNA_polymerase;	484	0.892562	0.30999	0.0140904
3.5.4.19	phosphoribosyl-AMP_cyclohydrolase;	316	0.894061	0.262467	0.0147649
5.3.1.16	1-(5-phosphoribosyl)-5-[(5-	332	0.894129	0.263363	0.0144539
3.6.1.31	phosphoribosyl-ATP_diphosphatase;	299	0.899798	0.256072	0.014809
2.5.1.49	O-acetylhomoserine_aminocarboxypropyltransferase;	243	0.900123	0.266542	0.0170987
2.3.1.89	tetrahydrodipicolinate_N-acetyltransferase;	19	0.90274	0.0828172	0.0189996
1.4.99.1	D-amino-acid_dehydrogenase;	184	0.903571	0.27619	0.020361
2.3.1.35	glutamate_N-acetyltransferase;	268	0.904237	0.292903	0.0178919
6.3.2.3	glutathione_synthase;	219	0.904338	0.286713	0.0193743
6.3.2.2	glutamate---cysteine_ligase;	193	0.904894	0.286362	0.0206128
1.2.1.2	formate_dehydrogenase;	266	0.907145	0.269938	0.016551
1.8.1.7	glutathione-disulfide_reductase;	240	0.9125	0.283157	0.0182777
1.3.3.3	coproporphyrinogen_oxidase;	77	0.912698	0.274162	0.0312437
2.3.1.51	1-acylglycerol-3-phosphate_O-acyltransferase;	300	0.91276	0.232521	0.0134246
4.1.1.2	oxalate_decarboxylase;	35	0.914286	0.284029	0.0480096
3.5.1.2	glutaminase;	173	0.91451	0.268887	0.0204431
1.1.1.41	isocitrate_dehydrogenase_(NAD+);	131	0.916348	0.236848	0.0206935
2.7.4.10	nucleoside-triphosphate---adenylate_kinase;	12	0.916667	0.288675	0.0833333
5.1.3.14	UDP-N-acetylglucosamine_2-epimerase;	251	0.920357	0.265973	0.016788
4.3.1.17	L-serine_ammonia-lyase;	318	0.920893	0.251907	0.0141262
2.4.2.17	ATP_phosphoribosyltransferase;	373	0.923077	0.227319	0.0117701
2.7.6.1	ribose-phosphate_diphosphokinase;	455	0.92322	0.232533	0.0109013
1.17.4.1	ribonucleoside-diphosphate_reductase;	464	0.924148	0.261282	0.0121297
2.6.1.16	glutamine---fructose-6-phosphate_transaminase_(isomerizing);	427	0.924528	0.250759	0.0121351
2.7.7.8	polyribonucleotide_nucleotidyltransferase;	454	0.92467	0.263546	0.0123688
2.7.1.21	thymidine_kinase;	243	0.925861	0.254613	0.0163335
2.7.1.48	uridine_kinase;	222	0.9266	0.250117	0.0167868
2.3.1.15	glycerol-3-phosphate_O-acyltransferase;	86	0.930589	0.170879	0.0184263
1.2.1.11	aspartate-semialdehyde_dehydrogenase;	363	0.931116	0.232337	0.0121945
2.7.2.4	aspartate_kinase;	362	0.933086	0.231896	0.0121882
2.1.1.37	DNA_(cytosine-5-)-methyltransferase;	135	0.93367	0.20188	0.017375
2.7.1.40	pyruvate_kinase;	448	0.93463	0.24653	0.0116474
2.6.1.52	phosphoserine_transaminase;	309	0.936174	0.234766	0.0133554
1.2.1.-	no_name	119	0.938223	0.182989	0.0167745
2.1.1.45	thymidylate_synthase;	346	0.940898	0.222965	0.0119867
3.1.3.11	fructose-bisphosphatase;	354	0.941175	0.217239	0.0115461
1.8.7.1	sulfite_reductase_(ferredoxin);	34	0.941176	0.238833	0.0409594
1.1.1.95	phosphoglycerate_dehydrogenase;	341	0.942164	0.224222	0.0121423
3.4.11.4	tripeptide_aminopeptidase;	164	0.942683	0.217018	0.0169463
3.6.1.9	nucleotide_diphosphatase;	3	0.942708	0.0992321	0.0572917
4.4.1.8	cystathionine_beta-lyase;	238	0.94491	0.194417	0.0126022
3.6.1.17	bis(5-nucleosyl)-tetraphosphatase_(asymmetrical);	26	0.946581	0.207561	0.0407061
1.2.1.3	aldehyde_dehydrogenase_(NAD+);	242	0.94785	0.198153	0.0127378
2.3.1.54	formate_C-acetyltransferase;	167	0.949033	0.216994	0.0167915
1.6.1.2	NAD(P)+_transhydrogenase_(AB-specific);	214	0.949766	0.216919	0.0148283
1.2.7.3	2-oxoglutarate_synthase;	110	0.95	0.210939	0.0201123
4.3.1.12	ornithine_cyclodeaminase;	141	0.953443	0.204739	0.0172422
3.5.1.49	formamidase	43	0.953488	0.213083	0.0324948
2.7.1.25	adenylyl-sulfate_kinase;	159	0.955237	0.191284	0.0151698
2.7.7.4	sulfate_adenylyltransferase;	162	0.956066	0.18959	0.0148956
2.5.1.6	methionine_adenosyltransferase;	240	0.957138	0.159051	0.0102667
2.1.1.10	homocysteine_S-methyltransferase;	80	0.957537	0.192908	0.0215678
3.5.2.9	5-oxoprolinase_(ATP-hydrolysing);	84	0.958333	0.19339	0.0211006
3.6.1.19	nucleoside-triphosphate_diphosphatase;	24	0.958333	0.204124	0.0416667
3.5.1.14	aminoacylase;	86	0.959302	0.191205	0.0206182
2.4.2.2	pyrimidine-nucleoside_phosphorylase;	68	0.959926	0.179819	0.0218062
3.5.4.5	cytidine_deaminase;	254	0.96063	0.194858	0.0122265
2.7.1.31	glycerate_kinase;	235	0.96145	0.17481	0.0114034
2.7.1.24	dephospho-CoA_kinase;	442	0.961727	0.185609	0.00882854
3.2.1.20	alpha-glucosidase;	155	0.961961	0.182064	0.0146237
2.3.1.40	acyl-[acyl-carrier-protein]---phospholipid_O-acyltransferase;	54	0.962963	0.190626	0.0259409
2.6.1.51	serine---pyruvate_transaminase;	28	0.964286	0.188982	0.0357143
5.1.3.9	N-acylglucosamine-6-phosphate_2-epimerase;	118	0.965044	0.170039	0.0156533
4.2.1.22	cystathionine_beta-synthase;	62	0.965385	0.115817	0.0147087
1.1.1.37	malate_dehydrogenase;	339	0.966273	0.174867	0.00949746
6.3.5.2	GMP_synthase_(glutamine-hydrolysing);	446	0.967339	0.168112	0.00796034
4.1.2.22	fructose-6-phosphate_phosphoketolase;	31	0.967742	0.179605	0.0322581
2.1.1.148	thymidylate_synthase_(FAD);	120	0.967857	0.17419	0.0159013
5.4.2.1	phosphoglycerate_mutase;	457	0.968205	0.165491	0.00774133
4.2.1.11	phosphopyruvate_hydratase;	461	0.968481	0.164796	0.00767532
2.7.1.56	1-phosphofructokinase;	188	0.969769	0.137177	0.0100047
3.3.1.1	adenosylhomocysteinase;	199	0.970207	0.138133	0.00979201
5.3.1.5	xylose_isomerase;	121	0.970468	0.119555	0.0108686
4.1.1.9	malonyl-CoA_decarboxylase;	34	0.970588	0.171499	0.0294118
4.4.1.21	S-ribosylhomocysteine_lyase;	138	0.972042	0.125985	0.0107246
3.5.1.31	formylmethionine_deformylase	38	0.973684	0.162221	0.0263158
1.2.1.12	glyceraldehyde-3-phosphate_dehydrogenase_(phosphorylating);	443	0.974423	0.147535	0.00700958
3.1.3.5	5-nucleotidase;	330	0.975253	0.145785	0.00802521
3.7.1.3	kynureninase	61	0.976321	0.133202	0.0170547
4.1.1.31	phosphoenolpyruvate_carboxylase;	254	0.976378	0.152168	0.00954789
3.5.4.12	dCMP_deaminase;	129	0.976486	0.134913	0.0118784
1.5.1.7	saccharopine_dehydrogenase_(NAD+,_L-lysine-forming);	44	0.977273	0.150756	0.0227273
3.1.4.4	phospholipase_D;	11	0.977273	0.0753778	0.0227273
6.4.1.1	pyruvate_carboxylase;	165	0.978586	0.13009	0.0101275
2.4.2.4	thymidine_phosphorylase;	154	0.979437	0.131092	0.0105637
2.7.1.33	pantothenate_kinase;	377	0.979443	0.131344	0.00676458
3.7.1.-	no_name	50	0.98	0.141421	0.02
2.7.1.2	glucokinase;	330	0.980182	0.120858	0.006653
2.7.7.18	nicotinate-nucleotide_adenylyltransferase;	371	0.980234	0.137213	0.00712375
2.7.1.92	5-dehydro-2-deoxygluconokinase;	77	0.980519	0.0973855	0.0110981
3.5.4.13	dCTP_deaminase;	309	0.980583	0.138211	0.00786254
3.2.2.9	adenosylhomocysteine_nucleosidase;	279	0.980795	0.111068	0.00664949
1.6.1.1	NAD(P)+_transhydrogenase_(B-specific);	108	0.981481	0.135445	0.0130332
2.7.7.3	pantetheine-phosphate_adenylyltransferase;	421	0.981591	0.124434	0.00606452
3.2.1.22	alpha-galactosidase;	109	0.981651	0.134829	0.0129142
3.4.11.2	membrane_alanyl_aminopeptidase;	274	0.981752	0.134093	0.00810083
2.4.2.9	uracil_phosphoribosyltransferase;	394	0.982234	0.13227	0.00666365
1.2.1.27	methylmalonate-semialdehyde_dehydrogenase_(acylating);	175	0.982857	0.130176	0.00984039
5.3.1.1	triose-phosphate_isomerase;	469	0.982951	0.115078	0.0053138
5.1.1.3	glutamate_racemase	419	0.983294	0.119194	0.00582301
3.6.1.23	dUTP_diphosphatase;	364	0.983516	0.127501	0.00668286
1.5.3.1	sarcosine_oxidase	125	0.984	0.12598	0.011268
2.1.3.2	aspartate_carbamoyltransferase;	413	0.9841	0.118137	0.00581315
3.5.2.3	dihydroorotase;	416	0.984215	0.117717	0.00577156
2.3.1.37	5-aminolevulinate_synthase;	63	0.984545	0.0860727	0.0108441
1.3.3.1	dihydroorotate_oxidase;	425	0.984549	0.116483	0.00565027
2.4.2.10	orotate_phosphoribosyltransferase;	439	0.985042	0.114639	0.00547141
2.6.1.66	valine---pyruvate_transaminase;	67	0.985075	0.122169	0.0149254
4.1.1.47	tartronate-semialdehyde_synthase;	58	0.985153	0.0739916	0.00971557
2.7.1.89	thiamine_kinase;	23	0.985267	0.018383	0.00383313
4.1.1.23	orotidine-5-phosphate_decarboxylase;	446	0.985277	0.113749	0.00538616
2.7.2.2	carbamate_kinase;	132	0.98548	0.0888721	0.00773532
5.3.1.9	glucose-6-phosphate_isomerase;	442	0.985857	0.0993039	0.0047234
4.2.1.2	fumarate_hydratase;	395	0.986245	0.108595	0.005464
2.7.2.3	phosphoglycerate_kinase;	460	0.986456	0.102434	0.00477602
2.3.2.2	gamma-glutamyltransferase;	281	0.986655	0.0993273	0.00592537
2.6.1.13	ornithine_aminotransferase;	78	0.987179	0.113228	0.0128205
1.1.1.2	alcohol_dehydrogenase_(NADP+);	79	0.987342	0.112509	0.0126582
1.5.99.8	proline_dehydrogenase;	241	0.987552	0.111105	0.00715692
4.1.1.49	phosphoenolpyruvate_carboxykinase_(ATP);	216	0.987798	0.0985171	0.00670324
6.2.1.5	succinate---CoA_ligase_(ADP-forming);	367	0.98792	0.100103	0.00522534
2.7.1.107	diacylglycerol_kinase;	246	0.987952	0.0637323	0.00406342
3.2.1.52	beta-N-acetylhexosaminidase;	164	0.98811	0.0984329	0.00768632
1.3.99.1	succinate_dehydrogenase;	400	0.988917	0.095932	0.0047966
2.4.2.7	adenine_phosphoribosyltransferase;	408	0.990196	0.0986492	0.00488386
1.17.4.2	ribonucleoside-triphosphate_reductase;	208	0.990385	0.0978209	0.00678266
2.1.2.3	phosphoribosylaminoimidazolecarboxamide_formyltransferase;	393	0.990731	0.0908666	0.00458361
2.7.9.2	pyruvate,_water_dikinase;	216	0.990741	0.096001	0.00653204
2.2.1.2	transaldolase;	419	0.991005	0.0904393	0.00441825
3.5.4.10	IMP_cyclohydrolase;	406	0.991027	0.0894113	0.00443741
4.1.1.17	ornithine_decarboxylase;	57	0.991228	0.0662266	0.00877193
3.5.3.8	formimidoylglutamase;	115	0.991304	0.0932505	0.00869565
2.4.2.1	purine-nucleoside_phosphorylase;	262	0.991412	0.0884775	0.00546616
2.7.9.3	selenide,_water_dikinase;	156	0.991521	0.0281956	0.00225745
2.7.4.22	UMP_kinase;	427	0.991608	0.0870334	0.00421184
6.3.4.4	adenylosuccinate_synthase;	437	0.991664	0.0862049	0.00412374
2.7.8.24	phosphatidylcholine_synthase;	40	0.991667	0.0527046	0.00833333
4.3.2.2	adenylosuccinate_lyase;	439	0.991702	0.0860097	0.00410502
3.2.2.1	purine_nucleosidase;	145	0.991724	0.0845769	0.00702373
3.1.5.1	dGTPase;	244	0.991803	0.0903493	0.00578402
2.3.1.16	acetyl-CoA_C-acyltransferase;	245	0.991837	0.0901655	0.00576046
4.3.1.19	threonine_ammonia-lyase;	311	0.991896	0.0817108	0.0046334
6.1.1.22	asparagine---tRNA_ligase;	135	0.992037	0.0232651	0.00200234
1.7.1.7	GMP_reductase;	129	0.992248	0.0880451	0.00775194
1.1.1.-	no_name	265	0.992453	0.0867098	0.00532654
1.1.1.27	L-lactate_dehydrogenase;	134	0.992537	0.0863868	0.00746269
1.1.1.60	2-hydroxy-3-oxopropionate_reductase;	116	0.992577	0.0526228	0.0048859
2.1.2.10	aminomethyltransferase;	328	0.992921	0.0742968	0.00410235
3.5.1.25	N-acetylglucosamine-6-phosphate_deacetylase;	280	0.993658	0.0537628	0.00321294
4.1.3.38	aminodeoxychorismate_lyase;	159	0.993711	0.0793052	0.00628931
1.1.1.35	3-hydroxyacyl-CoA_dehydrogenase;	160	0.99375	0.0790569	0.00625
1.1.2.3	L-lactate_dehydrogenase_(cytochrome);	161	0.993789	0.078811	0.00621118
5.1.3.1	ribulose-phosphate_3-epimerase;	460	0.993841	0.0679843	0.00316979
2.4.2.8	hypoxanthine_phosphoribosyltransferase;	348	0.994253	0.0757005	0.00405797
1.7.99.1	hydroxylamine_reductase;	29	0.994564	0.0204214	0.00379215
1.2.1.10	acetaldehyde_dehydrogenase_(acetylating);	186	0.994624	0.0733236	0.00537634
3.5.4.16	GTP_cyclohydrolase_I;	192	0.994792	0.0721688	0.00520833
5.3.1.6	ribose-5-phosphate_isomerase;	453	0.994849	0.0644389	0.0030276
2.4.2.-	no_name	368	0.994905	0.0489973	0.00255416
3.2.1.26	beta-fructofuranosidase;	110	0.995041	0.0520071	0.00495868
1.4.4.2	glycine_dehydrogenase_(decarboxylating);	326	0.995187	0.061948	0.00343098
4.2.1.17	enoyl-CoA_hydratase;	208	0.995192	0.0693375	0.00480769
3.5.4.4	adenosine_deaminase;	214	0.995327	0.0683586	0.0046729
1.1.1.40	malate_dehydrogenase_(oxaloacetate-decarboxylating)_(NADP+);	219	0.995434	0.0675737	0.00456621
2.3.3.9	malate_synthase;	226	0.995575	0.066519	0.00442478
4.1.2.25	dihydroneopterin_aldolase;	226	0.995575	0.066519	0.00442478
2.5.1.15	dihydropteroate_synthase;	232	0.99569	0.0656532	0.00431034
3.5.99.6	glucosamine-6-phosphate_deaminase;	233	0.995708	0.0655122	0.00429185
3.6.1.-	no_name	240	0.995833	0.0645497	0.00416667
6.3.5.4	asparagine_synthase_(glutamine-hydrolysing);	253	0.996047	0.0628695	0.00395257
1.5.1.3	dihydrofolate_reductase;	255	0.996078	0.0626224	0.00392157
1.4.1.4	glutamate_dehydrogenase_(NADP+);	190	0.99614	0.0376759	0.0027333
2.7.1.-	no_name	305	0.996175	0.0476411	0.00272792
3.2.1.21	beta-glucosidase;	196	0.996599	0.0476191	0.00340136
2.5.1.16	spermidine_synthase;	147	0.996599	0.0412393	0.00340136
1.1.1.44	phosphogluconate_dehydrogenase_(decarboxylating);	304	0.996711	0.0573539	0.00328947
6.2.1.1	acetate---CoA_ligase;	311	0.996785	0.0567048	0.00321543
4.1.1.50	adenosylmethionine_decarboxylase;	158	0.996835	0.0397779	0.00316456
2.3.1.8	phosphate_acetyltransferase;	323	0.996904	0.0556415	0.00309598
1.2.4.2	oxoglutarate_dehydrogenase_(succinyl-transferring);	326	0.996933	0.0553849	0.00306748
4.1.3.-	no_name	328	0.996951	0.0552158	0.00304878
2.7.2.1	acetate_kinase;	334	0.997006	0.0547176	0.00299401
1.1.1.94	glycerol-3-phosphate_dehydrogenase_[NAD(P)+];	427	0.997445	0.0485827	0.00235108
1.18.6.1	nitrogenase	59	0.997579	0.0185984	0.00242131
1.1.1.205	IMP_dehydrogenase;	438	0.997717	0.0477818	0.00228311
6.3.4.2	CTP_synthase;	480	0.997917	0.0456435	0.00208333
3.1.3.77	acireductone_synthase;	13	0.997959	0.00515647	0.00143015
4.2.1.109	methylthioribulose_1-phosphate_dehydratase;	13	0.997959	0.00515647	0.00143015
5.3.1.23	S-methyl-5-thioribose-1-phosphate_isomerase;	13	0.997959	0.00515647	0.00143015
4.1.3.40	chorismate_lyase;	115	0.998089	0.0150744	0.0014057
1.4.3.16	L-aspartate_oxidase	306	0.998094	0.0237817	0.00135951
5.4.2.8	phosphomannomutase;	227	0.998532	0.0221241	0.00146843
1.8.1.4	dihydrolipoyl_dehydrogenase;	407	0.998602	0.0250104	0.00123972
3.6.1.13	ADP-ribose_diphosphatase;	259	0.99867	0.0207214	0.00128756
5.4.2.2	phosphoglucomutase;	272	0.998775	0.0202113	0.00122549
5.3.1.8	mannose-6-phosphate_isomerase;	274	0.998783	0.0201374	0.00121654
3.2.1.-	no_name	280	0.998828	0.0113796	0.000680063
3.2.1.14	chitinase;	61	0.998907	0.00853583	0.0010929
1.14.13.2	4-hydroxybenzoate_3-monooxygenase;	73	0.999022	0.00836013	0.000978479
2.7.1.100	S-methyl-5-thioribose_kinase;	13	0.999298	0.00172382	0.000478101
3.1.4.46	glycerophosphodiester_phosphodiesterase;	324	0.999383	0.0111111	0.000617284
2.7.1.30	glycerol_kinase;	325	0.99972	0.00504272	0.00027972
1.-.-.-	no_name	74	1	0	0
1.1.-.-	no_name	101	1	0	0
1.1.1.10	L-xylulose_reductase;	3	1	0	0
1.1.1.103	L-threonine_3-dehydrogenase;	128	1	0	0
1.1.1.11	D-arabinitol_4-dehydrogenase;	14	1	0	0
1.1.1.122	D-threo-aldose_1-dehydrogenase;	4	1	0	0
1.1.1.125	2-deoxy-D-gluconate_3-dehydrogenase;	78	1	0	0
1.1.1.13	L-arabinitol_2-dehydrogenase;	8	1	0	0
1.1.1.130	3-dehydro-L-gulonate_2-dehydrogenase;	17	1	0	0
1.1.1.133	dTDP-4-dehydrorhamnose_reductase;	190	1	0	0
1.1.1.137	ribitol-5-phosphate_2-dehydrogenase;	2	1	0	0
1.1.1.14	L-iditol_2-dehydrogenase;	73	1	0	0
1.1.1.140	sorbitol-6-phosphate_2-dehydrogenase;	36	1	0	0
1.1.1.15	D-iditol_2-dehydrogenase;	1	1	NA	NA
1.1.1.154	ureidoglycolate_dehydrogenase	13	1	0	0
1.1.1.157	3-hydroxybutyryl-CoA_dehydrogenase;	174	1	0	0
1.1.1.169	2-dehydropantoate_2-reductase;	189	1	0	0
1.1.1.17	mannitol-1-phosphate_5-dehydrogenase;	85	1	0	0
1.1.1.178	3-hydroxy-2-methylbutyryl-CoA_dehydrogenase;	2	1	0	0
1.1.1.18	inositol_2-dehydrogenase;	34	1	0	0
1.1.1.193	5-amino-6-(5-phosphoribosylamino)uracil_reductase;	187	1	0	0
1.1.1.20	glucuronolactone_reductase;	1	1	NA	NA
1.1.1.21	aldehyde_reductase;	4	1	0	0
1.1.1.211	long-chain-3-hydroxyacyl-CoA_dehydrogenase;	1	1	NA	NA
1.1.1.22	UDP-glucose_6-dehydrogenase;	213	1	0	0
1.1.1.244	methanol_dehydrogenase	8	1	0	0
1.1.1.251	galactitol-1-phosphate_5-dehydrogenase	20	1	0	0
1.1.1.26	glyoxylate_reductase;	32	1	0	0
1.1.1.28	D-lactate_dehydrogenase;	191	1	0	0
1.1.1.282	quinate/shikimate_dehydrogenase;	16	1	0	0
1.1.1.284	S-(hydroxymethyl)glutathione_dehydrogenase;	16	1	0	0
1.1.1.29	glycerate_dehydrogenase;	58	1	0	0
1.1.1.290	4-phosphoerythronate_dehydogenase;	48	1	0	0
1.1.1.30	3-hydroxybutyrate_dehydrogenase;	133	1	0	0
1.1.1.31	3-hydroxyisobutyrate_dehydrogenase;	136	1	0	0
1.1.1.36	acetoacetyl-CoA_reductase;	97	1	0	0
1.1.1.38	malate_dehydrogenase_(oxaloacetate-decarboxylating);	201	1	0	0
1.1.1.39	malate_dehydrogenase_(decarboxylating);	52	1	0	0
1.1.1.43	phosphogluconate_2-dehydrogenase;	3	1	0	0
1.1.1.47	glucose_1-dehydrogenase;	61	1	0	0
1.1.1.56	ribitol_2-dehydrogenase;	13	1	0	0
1.1.1.57	fructuronate_reductase;	47	1	0	0
1.1.1.58	tagaturonate_reductase;	29	1	0	0
1.1.1.61	4-hydroxybutyrate_dehydrogenase;	10	1	0	0
1.1.1.67	mannitol_2-dehydrogenase;	17	1	0	0
1.1.1.72	glycerol_dehydrogenase_(NADP+);	1	1	NA	NA
1.1.1.77	lactaldehyde_reductase;	25	1	0	0
1.1.1.79	glyoxylate_reductase_(NADP+);	4	1	0	0
1.1.1.8	glycerol-3-phosphate_dehydrogenase_(NAD+);	13	1	0	0
1.1.1.81	hydroxypyruvate_reductase;	73	1	0	0
1.1.1.82	malate_dehydrogenase_(NADP+);	4	1	0	0
1.1.1.83	D-malate_dehydrogenase_(decarboxylating);	3	1	0	0
1.1.1.87	homoisocitrate_dehydrogenase;	3	1	0	0
1.1.1.9	D-xylulose_reductase;	19	1	0	0
1.1.1.90	aryl-alcohol_dehydrogenase;	5	1	0	0
1.1.1.93	tartrate_dehydrogenase;	9	1	0	0
1.1.2.-	no_name	2	1	0	0
1.1.2.4	D-lactate_dehydrogenase_(cytochrome);	95	1	0	0
1.1.3.15	(S)-2-hydroxy-acid_oxidase;	167	1	0	0
1.1.3.21	glycerol-3-phosphate_oxidase;	29	1	0	0
1.1.3.9	galactose_oxidase;	1	1	NA	NA
1.1.5.2	quinoprotein_glucose_dehydrogenase;	28	1	0	0
1.1.99.1	choline_dehydrogenase;	1	1	NA	NA
1.1.99.10	glucose_dehydrogenase_(acceptor);	2	1	0	0
1.1.99.13	glucoside_3-dehydrogenase;	1	1	NA	NA
1.1.99.14	glycolate_dehydrogenase;	2	1	0	0
1.1.99.16	malate_dehydrogenase_(acceptor);	146	1	0	0
1.1.99.2	2-hydroxyglutarate_dehydrogenase;	1	1	NA	NA
1.1.99.21	D-sorbitol_dehydrogenase_(acceptor);	7	1	0	0
1.1.99.25	quinate_dehydrogenase_(pyrroloquinoline-quinone);	5	1	0	0
1.1.99.5	glycerol-3-phosphate_dehydrogenase;	285	1	0	0
1.1.99.8	alcohol_dehydrogenase_(acceptor);	30	1	0	0
1.11.1.6	catalase;	160	1	0	0
1.11.1.7	peroxidase;	43	1	0	0
1.11.1.9	glutathione_peroxidase;	260	1	0	0
1.13.-.-	no_name	9	1	0	0
1.13.11.-	no_name	17	1	0	0
1.13.11.1	catechol_1,2-dioxygenase;	25	1	0	0
1.13.11.11	tryptophan_2,3-dioxygenase;	7	1	0	0
1.13.11.15	3,4-dihydroxyphenylacetate_2,3-dioxygenase;	34	1	0	0
1.13.11.16	3-carboxyethylcatechol_2,3-dioxygenase;	15	1	0	0
1.13.11.2	catechol_2,3-dioxygenase;	9	1	0	0
1.13.11.20	cysteine_dioxygenase;	1	1	NA	NA
1.13.11.27	4-hydroxyphenylpyruvate_dioxygenase;	48	1	0	0
1.13.11.3	protocatechuate_3,4-dioxygenase;	35	1	0	0
1.13.11.32	2-nitropropane_dioxygenase	39	1	0	0
1.13.11.37	hydroxyquinol_1,2-dioxygenase;	2	1	0	0
1.13.11.39	biphenyl-2,3-diol_1,2-dioxygenase;	3	1	0	0
1.13.11.4	gentisate_1,2-dioxygenase;	1	1	NA	NA
1.13.11.41	2,4-dihydroxyacetophenone_dioxygenase;	8	1	0	0
1.13.11.5	homogentisate_1,2-dioxygenase;	51	1	0	0
1.13.11.53	acireductone_dioxygenase_(Ni2+-requiring);	13	1	0	0
1.13.11.54	acireductone_dioxygenase_[iron(II)-requiring];	13	1	0	0
1.13.11.8	protocatechuate_4,5-dioxygenase;	2	1	0	0
1.13.12.-	no_name	38	1	0	0
1.13.12.4	lactate_2-monooxygenase;	10	1	0	0
1.14.-.-	no_name	36	1	0	0
1.14.11.17	taurine_dioxygenase;	78	1	0	0
1.14.11.2	procollagen-proline_dioxygenase;	8	1	0	0
1.14.12.-	no_name	32	1	0	0
1.14.12.1	anthranilate_1,2-dioxygenase_(deaminating,_decarboxylating);	3	1	0	0
1.14.12.10	benzoate_1,2-dioxygenase;	20	1	0	0
1.14.12.13	2-chlorobenzoate_1,2-dioxygenase;	4	1	0	0
1.14.12.18	biphenyl_2,3-dioxygenase;	2	1	0	0
1.14.13.1	salicylate_1-monooxygenase;	11	1	0	0
1.14.13.12	benzoate_4-monooxygenase;	1	1	NA	NA
1.14.13.24	3-hydroxybenzoate_6-monooxygenase;	1	1	NA	NA
1.14.13.25	methane_monooxygenase;	7	1	0	0
1.14.13.3	4-hydroxyphenylacetate_3-monooxygenase;	27	1	0	0
1.14.13.39	nitric-oxide_synthase;	26	1	0	0
1.14.13.7	phenol_2-monooxygenase;	4	1	0	0
1.14.13.82	vanillate_monooxygenase;	50	1	0	0
1.14.14.1	unspecific_monooxygenase;	5	1	0	0
1.14.15.3	alkane_1-monooxygenase;	1	1	NA	NA
1.14.99.-	no_name	13	1	0	0
1.17.1.4	xanthine_dehydrogenase;	98	1	0	0
1.17.99.1	4-cresol_dehydrogenase_(hydroxylating);	1	1	NA	NA
1.18.1.3	ferredoxin---NAD+_reductase;	1	1	NA	NA
1.19.6.1	nitrogenase_(flavodoxin)	3	1	0	0
1.2.1.13	glyceraldehyde-3-phosphate_dehydrogenase_(NADP+)_(phosphorylating);	4	1	0	0
1.2.1.16	succinate-semialdehyde_dehydrogenase_[NAD(P)+];	259	1	0	0
1.2.1.18	malonate-semialdehyde_dehydrogenase_(acetylating);	3	1	0	0
1.2.1.19	aminobutyraldehyde_dehydrogenase;	23	1	0	0
1.2.1.21	glycolaldehyde_dehydrogenase;	21	1	0	0
1.2.1.22	lactaldehyde_dehydrogenase;	39	1	0	0
1.2.1.24	succinate-semialdehyde_dehydrogenase;	2	1	0	0
1.2.1.25	2-oxoisovalerate_dehydrogenase_(acylating);	1	1	NA	NA
1.2.1.26	2,5-dioxovalerate_dehydrogenase;	1	1	NA	NA
1.2.1.28	benzaldehyde_dehydrogenase_(NAD+);	27	1	0	0
1.2.1.31	L-aminoadipate-semialdehyde_dehydrogenase;	2	1	0	0
1.2.1.32	aminomuconate-semialdehyde_dehydrogenase;	2	1	0	0
1.2.1.39	phenylacetaldehyde_dehydrogenase	18	1	0	0
1.2.1.41	glutamate-5-semialdehyde_dehydrogenase;	231	1	0	0
1.2.1.43	formate_dehydrogenase_(NADP+);	2	1	0	0
1.2.1.45	4-carboxy-2-hydroxymuconate-6-semialdehyde_dehydrogenase;	6	1	0	0
1.2.1.46	formaldehyde_dehydrogenase;	25	1	0	0
1.2.1.5	aldehyde_dehydrogenase_[NAD(P)+];	9	1	0	0
1.2.1.60	5-carboxymethyl-2-hydroxymuconic-semialdehyde_dehydrogenase;	40	1	0	0
1.2.1.63	6-oxohexanoate_dehydrogenase	1	1	NA	NA
1.2.1.65	salicylaldehyde_dehydrogenase	1	1	NA	NA
1.2.1.71	succinylglutamate-semialdehyde_dehydrogenase;	59	1	0	0
1.2.1.72	erythrose-4-phosphate_dehydrogenase;	51	1	0	0
1.2.1.8	betaine-aldehyde_dehydrogenase;	2	1	0	0
1.2.2.1	formate_dehydrogenase_(cytochrome);	11	1	0	0
1.2.2.2	pyruvate_dehydrogenase_(cytochrome);	92	1	0	0
1.2.3.3	pyruvate_oxidase;	50	1	0	0
1.2.4.1	pyruvate_dehydrogenase_(acetyl-transferring);	396	1	0	0
1.2.4.4	3-methyl-2-oxobutanoate_dehydrogenase	135	1	0	0
1.2.7.1	pyruvate_synthase;	39	1	0	0
1.2.99.2	carbon-monoxide_dehydrogenase_(acceptor);	82	1	0	0
1.2.99.3	aldehyde_dehydrogenase_(pyrroloquinoline-quinone);	5	1	0	0
1.3.1.-	no_name	54	1	0	0
1.3.1.1	dihydrouracil_dehydrogenase_(NAD+);	24	1	0	0
1.3.1.2	dihydropyrimidine_dehydrogenase_(NADP+);	19	1	0	0
1.3.1.25	1,6-dihydroxycyclohexa-2,4-diene-1-carboxylate_dehydrogenase;	22	1	0	0
1.3.1.32	maleylacetate_reductase;	10	1	0	0
1.3.1.44	trans-2-enoyl-CoA_reductase_(NAD+);	1	1	NA	NA
1.3.1.56	cis-2,3-dihydrobiphenyl-2,3-diol_dehydrogenase;	2	1	0	0
1.3.1.58	2,3-dihydroxy-2,3-dihydro-p-cumate_dehydrogenase	2	1	0	0
1.3.3.6	acyl-CoA_oxidase;	14	1	0	0
1.3.5.1	succinate_dehydrogenase_(ubiquinone);	72	1	0	0
1.3.99.-	no_name	199	1	0	0
1.3.99.11	dihydroorotate_dehydrogenase;	2	1	0	0
1.3.99.13	long-chain-acyl-CoA_dehydrogenase;	12	1	0	0
1.3.99.2	butyryl-CoA_dehydrogenase;	71	1	0	0
1.3.99.20	4-hydroxybenzoyl-CoA_reductase;	11	1	0	0
1.3.99.21	(R)-benzylsuccinyl-CoA_dehydrogenase;	4	1	0	0
1.3.99.3	acyl-CoA_dehydrogenase;	124	1	0	0
1.3.99.7	glutaryl-CoA_dehydrogenase;	119	1	0	0
1.4.-.-	no_name	4	1	0	0
1.4.1.13	glutamate_synthase_(NADPH);	326	1	0	0
1.4.1.14	glutamate_synthase_(NADH);	8	1	0	0
1.4.1.16	diaminopimelate_dehydrogenase;	16	1	0	0
1.4.1.2	glutamate_dehydrogenase;	69	1	0	0
1.4.1.20	phenylalanine_dehydrogenase;	3	1	0	0
1.4.1.3	glutamate_dehydrogenase_[NAD(P)+];	76	1	0	0
1.4.2.-	no_name	3	1	0	0
1.4.3.-	no_name	10	1	0	0
1.4.3.10	putrescine_oxidase	4	1	0	0
1.4.3.3	D-amino-acid_oxidase;	16	1	0	0
1.4.3.4	amine_oxidase_(flavin-containing);	37	1	0	0
1.4.3.6	amine_oxidase_(copper-containing);	27	1	0	0
1.4.7.1	glutamate_synthase_(ferredoxin);	103	1	0	0
1.4.99.2	taurine_dehydrogenase;	1	1	NA	NA
1.4.99.3	amine_dehydrogenase;	9	1	0	0
1.5.1.-	no_name	7	1	0	0
1.5.1.10	saccharopine_dehydrogenase_(NADP+,_L-glutamate-forming);	2	1	0	0
1.5.1.11	D-octopine_dehydrogenase;	1	1	NA	NA
1.5.1.15	methylenetetrahydrofolate_dehydrogenase_(NAD+);	1	1	NA	NA
1.5.1.19	D-nopaline_dehydrogenase;	4	1	0	0
1.5.1.20	methylenetetrahydrofolate_reductase_[NAD(P)H];	192	1	0	0
1.5.1.8	saccharopine_dehydrogenase_(NADP+,_L-lysine-forming);	2	1	0	0
1.5.1.9	saccharopine_dehydrogenase_(NAD+,_L-glutamate-forming);	1	1	NA	NA
1.5.8.2	trimethylamine_dehydrogenase	22	1	0	0
1.5.99.1	sarcosine_dehydrogenase;	9	1	0	0
1.5.99.2	dimethylglycine_dehydrogenase;	11	1	0	0
1.6.5.3	NADH_dehydrogenase_(ubiquinone);	174	1	0	0
1.7.1.-	no_name	9	1	0	0
1.7.1.1	nitrate_reductase_(NADH);	4	1	0	0
1.7.2.1	nitrite_reductase_(NO-forming);	20	1	0	0
1.7.2.2	nitrite_reductase_(cytochrome;_ammonia-forming);	81	1	0	0
1.7.3.4	hydroxylamine_oxidase;	2	1	0	0
1.7.7.1	ferredoxin---nitrite_reductase	79	1	0	0
1.7.7.2	ferredoxin---nitrate_reductase;	14	1	0	0
1.7.99.4	nitrate_reductase;	106	1	0	0
1.7.99.6	nitrous-oxide_reductase;	14	1	0	0
1.7.99.7	nitric-oxide_reductase;	12	1	0	0
1.8.1.3	hypotaurine_dehydrogenase	1	1	NA	NA
1.8.1.6	cystine_reductase;	1	1	NA	NA
1.8.1.9	thioredoxin-disulfide_reductase;	445	1	0	0
1.8.2.1	sulfite_dehydrogenase;	4	1	0	0
1.8.3.1	sulfite_oxidase	7	1	0	0
1.8.4.-	no_name	25	1	0	0
1.8.4.2	protein-disulfide_reductase_(glutathione);	4	1	0	0
1.8.4.7	enzyme-thiol_transhydrogenase_(glutathione-disulfide);	1	1	NA	NA
1.8.4.8	phosphoadenylyl-sulfate_reductase_(thioredoxin);	186	1	0	0
1.9.6.1	nitrate_reductase_(cytochrome);	1	1	NA	NA
2.1.1.103	phosphoethanolamine_N-methyltransferase;	1	1	NA	NA
2.1.1.114	hexaprenyldihydroxybenzoate_methyltransferase;	1	1	NA	NA
2.1.1.13	methionine_synthase;	256	1	0	0
2.1.1.17	phosphatidylethanolamine_N-methyltransferase;	5	1	0	0
2.1.1.5	betaine---homocysteine_S-methyltransferase;	2	1	0	0
2.1.1.71	phosphatidyl-N-methylethanolamine_N-methyltransferase;	5	1	0	0
2.1.2.11	3-methyl-2-oxobutanoate_hydroxymethyltransferase;	188	1	0	0
2.1.2.2	phosphoribosylglycinamide_formyltransferase;	384	1	0	0
2.1.2.5	glutamate_formimidoyltransferase;	20	1	0	0
2.1.2.9	methionyl-tRNA_formyltransferase;	315	1	0	0
2.1.3.1	methylmalonyl-CoA_carboxytransferase;	3	1	0	0
2.3.1.109	arginine_N-succinyltransferase;	20	1	0	0
2.3.1.12	dihydrolipoyllysine-residue_acetyltransferase;	337	1	0	0
2.3.1.168	dihydrolipoyllysine-residue_(2-methylpropanoyl)transferase;	14	1	0	0
2.3.1.174	3-oxoadipyl-CoA_thiolase	6	1	0	0
2.3.1.179	beta-ketoacyl-acyl-carrier-protein_synthase_II;	96	1	0	0
2.3.1.180	beta-ketoacyl-acyl-carrier-protein_synthase_III;	101	1	0	0
2.3.1.19	phosphate_butyryltransferase;	30	1	0	0
2.3.1.29	glycine_C-acetyltransferase;	177	1	0	0
2.3.1.39	[acyl-carrier-protein]_S-malonyltransferase;	386	1	0	0
2.3.1.4	glucosamine-phosphate_N-acetyltransferase;	2	1	0	0
2.3.1.41	beta-ketoacyl-acyl-carrier-protein_synthase_I;	89	1	0	0
2.3.1.43	phosphatidylcholine---sterol_O-acyltransferase;	1	1	NA	NA
2.3.1.47	8-amino-7-oxononanoate_synthase;	244	1	0	0
2.3.1.61	dihydrolipoyllysine-residue_succinyltransferase;	319	1	0	0
2.3.1.7	carnitine_O-acetyltransferase;	5	1	0	0
2.3.1.9	acetyl-CoA_C-acetyltransferase;	315	1	0	0
2.3.3.-	no_name	3	1	0	0
2.3.3.10	hydroxymethylglutaryl-CoA_synthase;	10	1	0	0
2.3.3.15	sulfoacetaldehyde_acetyltransferase;	8	1	0	0
2.3.3.5	2-methylcitrate_synthase;	3	1	0	0
2.3.3.8	ATP_citrate_synthase;	5	1	0	0
2.4.1.1	phosphorylase;	221	1	0	0
2.4.1.10	levansucrase;	15	1	0	0
2.4.1.11	glycogen(starch)_synthase;	1	1	NA	NA
2.4.1.12	cellulose_synthase_(UDP-forming);	47	1	0	0
2.4.1.13	sucrose_synthase;	3	1	0	0
2.4.1.14	sucrose-phosphate_synthase;	1	1	NA	NA
2.4.1.15	alpha,alpha-trehalose-phosphate_synthase_(UDP-forming);	50	1	0	0
2.4.1.17	glucuronosyltransferase;	8	1	0	0
2.4.1.18	1,4-alpha-glucan_branching_enzyme;	204	1	0	0
2.4.1.20	cellobiose_phosphorylase	8	1	0	0
2.4.1.21	starch_synthase;	164	1	0	0
2.4.1.25	4-alpha-glucanotransferase;	98	1	0	0
2.4.1.4	amylosucrase;	10	1	0	0
2.4.1.5	dextransucrase;	8	1	0	0
2.4.1.64	alpha,alpha-trehalose_phosphorylase;	1	1	NA	NA
2.4.1.7	sucrose_phosphorylase;	51	1	0	0
2.4.1.8	maltose_phosphorylase	27	1	0	0
2.4.2.12	nicotinamide_phosphoribosyltransferase;	2	1	0	0
2.4.2.14	amidophosphoribosyltransferase;	355	1	0	0
2.4.2.22	xanthine_phosphoribosyltransferase;	128	1	0	0
2.4.2.3	uridine_phosphorylase;	107	1	0	0
2.4.2.6	nucleoside_deoxyribosyltransferase;	14	1	0	0
2.5.1.18	glutathione_transferase;	188	1	0	0
2.5.1.56	N-acetylneuraminate_synthase;	29	1	0	0
2.5.1.57	N-acylneuraminate-9-phosphate_synthase;	8	1	0	0
2.6.1.18	beta-alanine---pyruvate_transaminase;	88	1	0	0
2.6.1.19	4-aminobutyrate_transaminase;	185	1	0	0
2.6.1.2	alanine_transaminase;	27	1	0	0
2.6.1.22	(S)-3-amino-2-methylpropionate_transaminase;	61	1	0	0
2.6.1.3	cysteine_transaminase;	1	1	NA	NA
2.6.1.36	L-lysine_6-transaminase;	22	1	0	0
2.6.1.37	2-aminoethylphosphonate---pyruvate_transaminase;	25	1	0	0
2.6.1.39	2-aminoadipate_transaminase;	9	1	0	0
2.6.1.44	alanine---glyoxylate_transaminase;	31	1	0	0
2.6.1.45	serine---glyoxylate_transaminase	42	1	0	0
2.6.1.62	adenosylmethionine---8-amino-7-oxononanoate_transaminase;	249	1	0	0
2.6.1.77	taurine---pyruvate_aminotransferase;	2	1	0	0
2.6.1.81	succinylornithine_transaminase;	22	1	0	0
2.6.1.82	putrescine_aminotransferase;	18	1	0	0
2.6.1.85	aminodeoxychorismate_synthase;	147	1	0	0
2.7.1.1	hexokinase;	3	1	0	0
2.7.1.105	6-phosphofructo-2-kinase;	3	1	0	0
2.7.1.11	6-phosphofructokinase;	292	1	0	0
2.7.1.113	deoxyguanosine_kinase;	68	1	0	0
2.7.1.12	gluconokinase;	201	1	0	0
2.7.1.13	dehydrogluconokinase;	1	1	NA	NA
2.7.1.144	tagatose-6-phosphate_kinase	74	1	0	0
2.7.1.15	ribokinase;	237	1	0	0
2.7.1.16	ribulokinase;	78	1	0	0
2.7.1.17	xylulokinase;	159	1	0	0
2.7.1.19	phosphoribulokinase;	56	1	0	0
2.7.1.20	adenosine_kinase;	26	1	0	0
2.7.1.29	glycerone_kinase;	85	1	0	0
2.7.1.3	ketohexokinase;	2	1	0	0
2.7.1.4	fructokinase;	239	1	0	0
2.7.1.41	glucose-1-phosphate_phosphodismutase	8	1	0	0
2.7.1.45	2-dehydro-3-deoxygluconokinase;	130	1	0	0
2.7.1.47	D-ribulokinase;	11	1	0	0
2.7.1.5	rhamnulokinase;	42	1	0	0
2.7.1.51	L-fuculokinase;	14	1	0	0
2.7.1.53	L-xylulokinase;	30	1	0	0
2.7.1.58	2-dehydro-3-deoxygalactonokinase;	38	1	0	0
2.7.1.59	N-acetylglucosamine_kinase;	55	1	0	0
2.7.1.6	galactokinase;	120	1	0	0
2.7.1.60	N-acylmannosamine_kinase;	55	1	0	0
2.7.1.63	polyphosphate---glucose_phosphotransferase;	48	1	0	0
2.7.1.7	mannokinase;	1	1	NA	NA
2.7.1.73	inosine_kinase;	56	1	0	0
2.7.1.76	deoxyadenosine_kinase;	16	1	0	0
2.7.1.82	ethanolamine_kinase;	1	1	NA	NA
2.7.1.90	diphosphate---fructose-6-phosphate_1-phosphotransferase;	39	1	0	0
2.7.2.11	glutamate_5-kinase;	231	1	0	0
2.7.2.15	propionate_kinase;	20	1	0	0
2.7.2.7	butyrate_kinase	20	1	0	0
2.7.4.23	ribose_1,5-bisphosphate_phosphokinase;	68	1	0	0
2.7.6.3	2-amino-4-hydroxy-6-hydroxymethyldihydropteridine_diphosphokinase;	228	1	0	0
2.7.6.5	GTP_diphosphokinase;	107	1	0	0
2.7.7.-	no_name	432	1	0	0
2.7.7.1	nicotinamide-nucleotide_adenylyltransferase;	84	1	0	0
2.7.7.10	UTP---hexose-1-phosphate_uridylyltransferase;	59	1	0	0
2.7.7.12	UDP-glucose---hexose-1-phosphate_uridylyltransferase;	69	1	0	0
2.7.7.13	mannose-1-phosphate_guanylyltransferase;	5	1	0	0
2.7.7.22	mannose-1-phosphate_guanylyltransferase_(GDP);	6	1	0	0
2.7.7.24	glucose-1-phosphate_thymidylyltransferase;	239	1	0	0
2.7.7.27	glucose-1-phosphate_adenylyltransferase;	191	1	0	0
2.7.7.33	glucose-1-phosphate_cytidylyltransferase;	69	1	0	0
2.7.7.43	N-acylneuraminate_cytidylyltransferase;	29	1	0	0
2.7.7.48	RNA-directed_RNA_polymerase;	1	1	NA	NA
2.7.7.53	ATP_adenylyltransferase;	7	1	0	0
2.7.7.9	UTP---glucose-1-phosphate_uridylyltransferase;	263	1	0	0
2.7.8.20	phosphatidylglycerol---membrane-oligosaccharide	37	1	0	0
2.7.9.1	pyruvate,_phosphate_dikinase;	149	1	0	0
2.8.1.2	3-mercaptopyruvate_sulfurtransferase;	70	1	0	0
2.8.1.6	biotin_synthase	302	1	0	0
2.8.3.-	no_name	43	1	0	0
2.8.3.1	propionate_CoA-transferase;	11	1	0	0
2.8.3.10	citrate_CoA-transferase	51	1	0	0
2.8.3.12	glutaconate_CoA-transferase	18	1	0	0
2.8.3.15	succinyl-CoA:(R)-benzylsuccinate_CoA-transferase;	2	1	0	0
2.8.3.5	3-oxoacid_CoA-transferase;	140	1	0	0
2.8.3.6	3-oxoadipate_CoA-transferase;	70	1	0	0
2.8.3.8	acetate_CoA-transferase;	39	1	0	0
3.1.1.-	no_name	132	1	0	0
3.1.1.11	pectinesterase;	7	1	0	0
3.1.1.17	gluconolactonase;	51	1	0	0
3.1.1.22	hydroxybutyrate-dimer_hydrolase;	13	1	0	0
3.1.1.24	3-oxoadipate_enol-lactonase;	44	1	0	0
3.1.1.31	6-phosphogluconolactonase;	256	1	0	0
3.1.1.32	phospholipase_A1	52	1	0	0
3.1.1.4	phospholipase_A2;	7	1	0	0
3.1.1.45	carboxymethylenebutenolidase;	9	1	0	0
3.1.1.5	lysophospholipase;	99	1	0	0
3.1.1.57	2-pyrone-4,6-dicarboxylate_lactonase	3	1	0	0
3.1.2.-	no_name	190	1	0	0
3.1.2.1	acetyl-CoA_hydrolase;	41	1	0	0
3.1.2.12	S-formylglutathione_hydrolase	16	1	0	0
3.1.2.23	4-hydroxybenzoyl-CoA_thioesterase	19	1	0	0
3.1.2.4	3-hydroxyisobutyryl-CoA_hydrolase;	1	1	NA	NA
3.1.2.6	hydroxyacylglutathione_hydrolase;	198	1	0	0
3.1.3.1	alkaline_phosphatase;	127	1	0	0
3.1.3.10	glucose-1-phosphatase	22	1	0	0
3.1.3.12	trehalose-phosphatase;	53	1	0	0
3.1.3.18	phosphoglycolate_phosphatase;	162	1	0	0
3.1.3.25	inositol-phosphate_phosphatase;	90	1	0	0
3.1.3.29	N-acylneuraminate-9-phosphatase;	1	1	NA	NA
3.1.3.37	sedoheptulose-bisphosphatase;	6	1	0	0
3.1.3.46	fructose-2,6-bisphosphate_2-phosphatase;	9	1	0	0
3.1.3.6	3-nucleotidase;	27	1	0	0
3.1.3.7	3(2),5-bisphosphate_nucleotidase;	16	1	0	0
3.1.4.-	no_name	173	1	0	0
3.1.4.16	2,3-cyclic-nucleotide_2-phosphodiesterase;	21	1	0	0
3.1.4.17	3,5-cyclic-nucleotide_phosphodiesterase;	34	1	0	0
3.1.7.2	guanosine-3,5-bis(diphosphate)_3-diphosphatase;	177	1	0	0
3.11.1.1	phosphonoacetaldehyde_hydrolase;	30	1	0	0
3.11.1.2	phosphonoacetate_hydrolase	8	1	0	0
3.2.1.1	alpha-amylase;	26	1	0	0
3.2.1.10	oligo-1,6-glucosidase;	38	1	0	0
3.2.1.122	maltose-6-phosphate_glucosidase;	1	1	NA	NA
3.2.1.132	chitosanase	2	1	0	0
3.2.1.15	polygalacturonase;	1	1	NA	NA
3.2.1.28	alpha,alpha-trehalase;	52	1	0	0
3.2.1.31	beta-glucuronidase;	12	1	0	0
3.2.1.33	amylo-alpha-1,6-glucosidase;	7	1	0	0
3.2.1.37	xylan_1,4-beta-xylosidase;	26	1	0	0
3.2.1.39	glucan_endo-1,3-beta-D-glucosidase;	9	1	0	0
3.2.1.4	cellulase;	87	1	0	0
3.2.1.55	alpha-N-arabinofuranosidase;	19	1	0	0
3.2.1.58	glucan_1,3-beta-glucosidase;	4	1	0	0
3.2.1.65	levanase;	5	1	0	0
3.2.1.74	glucan_1,4-beta-glucosidase;	2	1	0	0
3.2.1.78	mannan_endo-1,4-beta-mannosidase;	11	1	0	0
3.2.1.80	fructan_beta-fructosidase;	3	1	0	0
3.2.1.85	6-phospho-beta-galactosidase;	39	1	0	0
3.2.1.86	6-phospho-beta-glucosidase;	127	1	0	0
3.2.1.91	cellulose_1,4-beta-cellobiosidase;	3	1	0	0
3.2.1.93	alpha,alpha-phosphotrehalase;	19	1	0	0
3.2.2.16	methylthioadenosine_nucleosidase;	231	1	0	0
3.2.2.3	uridine_nucleosidase;	1	1	NA	NA
3.2.2.4	AMP_nucleosidase;	114	1	0	0
3.2.2.8	ribosylpyrimidine_nucleosidase;	15	1	0	0
3.5.1.10	formyltetrahydrofolate_deformylase	237	1	0	0
3.5.1.16	acetylornithine_deacetylase;	174	1	0	0
3.5.1.24	choloylglycine_hydrolase;	68	1	0	0
3.5.1.27	N-formylmethionylaminoacyl-tRNA_deformylase	2	1	0	0
3.5.1.32	hippurate_hydrolase	19	1	0	0
3.5.1.33	N-acetylglucosamine_deacetylase;	1	1	NA	NA
3.5.1.4	amidase;	55	1	0	0
3.5.1.5	urease	183	1	0	0
3.5.1.54	allophanate_hydrolase;	51	1	0	0
3.5.1.56	N,N-dimethylformamidase;	1	1	NA	NA
3.5.1.59	N-carbamoylsarcosine_amidase;	5	1	0	0
3.5.1.6	beta-ureidopropionase	41	1	0	0
3.5.1.68	N-formylglutamate_deformylase;	38	1	0	0
3.5.1.78	glutathionylspermidine_amidase;	27	1	0	0
3.5.1.94	gamma-glutamyl-gamma-aminobutyrate_hydrolase;	10	1	0	0
3.5.1.96	succinylglutamate_desuccinylase;	70	1	0	0
3.5.2.10	creatininase;	4	1	0	0
3.5.2.14	N-methylhydantoinase_(ATP-hydrolysing);	1	1	NA	NA
3.5.2.2	dihydropyrimidinase;	41	1	0	0
3.5.2.5	allantoinase	11	1	0	0
3.5.2.7	imidazolonepropionase;	126	1	0	0
3.5.3.1	arginase;	98	1	0	0
3.5.3.11	agmatinase;	102	1	0	0
3.5.3.13	formimidoylglutamate_deiminase;	16	1	0	0
3.5.3.19	ureidoglycolate_hydrolase	81	1	0	0
3.5.3.23	N-succinylarginine_dihydrolase;	21	1	0	0
3.5.3.3	creatinase	7	1	0	0
3.5.3.4	allantoicase	45	1	0	0
3.5.3.6	arginine_deiminase;	131	1	0	0
3.5.3.7	guanidinobutyrase;	1	1	NA	NA
3.5.4.1	cytosine_deaminase;	162	1	0	0
3.5.4.2	adenine_deaminase;	84	1	0	0
3.5.4.25	GTP_cyclohydrolase_II;	178	1	0	0
3.5.4.26	diaminohydroxyphosphoribosylaminopyrimidine_deaminase	180	1	0	0
3.5.4.3	guanine_deaminase;	96	1	0	0
3.5.5.1	nitrilase;	63	1	0	0
3.5.5.7	aliphatic_nitrilase	7	1	0	0
3.5.99.7	1-aminocyclopropane-1-carboxylate_deaminase;	80	1	0	0
3.6.1.11	exopolyphosphatase;	146	1	0	0
3.6.1.15	nucleoside-triphosphatase;	372	1	0	0
3.6.1.22	NAD+_diphosphatase;	12	1	0	0
3.6.1.26	CDP-diacylglycerol_diphosphatase;	45	1	0	0
3.6.1.3	adenosinetriphosphatase;	5	1	0	0
3.6.1.39	thymidine-triphosphatase;	1	1	NA	NA
3.6.1.40	guanosine-5-triphosphate,3-diphosphate_diphosphatase;	55	1	0	0
3.6.1.41	bis(5-nucleosyl)-tetraphosphatase_(symmetrical);	180	1	0	0
3.6.1.5	apyrase;	3	1	0	0
3.6.1.7	acylphosphatase;	244	1	0	0
3.6.4.1	myosin_ATPase	1	1	NA	NA
3.7.1.2	fumarylacetoacetase;	87	1	0	0
3.7.1.5	acylpyruvate_hydrolase	9	1	0	0
3.7.1.8	2,6-dioxo-6-phenylhexa-3-enoate_hydrolase;	3	1	0	0
3.7.1.9	2-hydroxymuconate-semialdehyde_hydrolase;	1	1	NA	NA
3.8.1.2	(S)-2-haloacid_dehalogenase;	94	1	0	0
3.8.1.3	haloacetate_dehalogenase;	15	1	0	0
3.8.1.5	haloalkane_dehalogenase;	6	1	0	0
4.1.1.-	no_name	293	1	0	0
4.1.1.1	pyruvate_decarboxylase;	35	1	0	0
4.1.1.11	aspartate_1-decarboxylase;	234	1	0	0
4.1.1.15	glutamate_decarboxylase;	78	1	0	0
4.1.1.19	arginine_decarboxylase;	120	1	0	0
4.1.1.21	phosphoribosylaminoimidazole_carboxylase;	379	1	0	0
4.1.1.28	aromatic-L-amino-acid_decarboxylase;	1	1	NA	NA
4.1.1.29	sulfinoalanine_decarboxylase;	1	1	NA	NA
4.1.1.3	oxaloacetate_decarboxylase;	98	1	0	0
4.1.1.32	phosphoenolpyruvate_carboxykinase_(GTP);	97	1	0	0
4.1.1.36	phosphopantothenoylcysteine_decarboxylase;	375	1	0	0
4.1.1.39	ribulose-bisphosphate_carboxylase;	64	1	0	0
4.1.1.4	acetoacetate_decarboxylase;	33	1	0	0
4.1.1.41	methylmalonyl-CoA_decarboxylase;	28	1	0	0
4.1.1.44	4-carboxymuconolactone_decarboxylase;	42	1	0	0
4.1.1.55	4,5-dihydroxyphthalate_decarboxylase;	8	1	0	0
4.1.1.61	4-hydroxybenzoate_decarboxylase;	1	1	NA	NA
4.1.1.68	5-oxopent-3-ene-1,2,5-tricarboxylate_decarboxylase;	42	1	0	0
4.1.1.7	benzoylformate_decarboxylase;	6	1	0	0
4.1.1.70	glutaconyl-CoA_decarboxylase;	4	1	0	0
4.1.1.77	4-oxalocrotonate_decarboxylase;	9	1	0	0
4.1.1.82	phosphonopyruvate_decarboxylase;	2	1	0	0
4.1.1.85	3-dehydro-L-gulonate-6-phosphate_decarboxylase;	58	1	0	0
4.1.2.-	no_name	184	1	0	0
4.1.2.14	2-dehydro-3-deoxy-phosphogluconate_aldolase;	245	1	0	0
4.1.2.17	L-fuculose-phosphate_aldolase;	23	1	0	0
4.1.2.19	rhamnulose-1-phosphate_aldolase;	48	1	0	0
4.1.2.20	2-dehydro-3-deoxyglucarate_aldolase;	66	1	0	0
4.1.2.21	2-dehydro-3-deoxy-6-phosphogalactonate_aldolase;	39	1	0	0
4.1.2.27	sphinganine-1-phosphate_aldolase;	3	1	0	0
4.1.2.4	deoxyribose-phosphate_aldolase;	294	1	0	0
4.1.2.40	tagatose-bisphosphate_aldolase;	99	1	0	0
4.1.2.9	phosphoketolase;	38	1	0	0
4.1.3.1	isocitrate_lyase;	191	1	0	0
4.1.3.16	4-hydroxy-2-oxoglutarate_aldolase;	227	1	0	0
4.1.3.17	4-hydroxy-4-methyl-2-oxoglutarate_aldolase;	4	1	0	0
4.1.3.24	malyl-CoA_lyase;	4	1	0	0
4.1.3.3	N-acetylneuraminate_lyase;	80	1	0	0
4.1.3.30	methylisocitrate_lyase;	125	1	0	0
4.1.3.34	citryl-CoA_lyase;	76	1	0	0
4.1.3.39	4-hydroxy-2-oxovalerate_aldolase;	66	1	0	0
4.1.3.4	hydroxymethylglutaryl-CoA_lyase;	139	1	0	0
4.1.3.6	citrate_(pro-3S)-lyase;	176	1	0	0
4.1.99.-	no_name	6	1	0	0
4.1.99.1	tryptophanase;	37	1	0	0
4.1.99.11	benzylsuccinate_synthase;	1	1	NA	NA
4.1.99.2	tyrosine_phenol-lyase;	5	1	0	0
4.2.1.104	cyanase;	82	1	0	0
4.2.1.12	phosphogluconate_dehydratase;	149	1	0	0
4.2.1.18	methylglutaconyl-CoA_hydratase;	1	1	NA	NA
4.2.1.32	L(+)-tartrate_dehydratase;	32	1	0	0
4.2.1.40	glucarate_dehydratase;	38	1	0	0
4.2.1.41	5-dehydro-4-deoxyglucarate_dehydratase;	17	1	0	0
4.2.1.42	galactarate_dehydratase;	35	1	0	0
4.2.1.46	dTDP-glucose_4,6-dehydratase;	233	1	0	0
4.2.1.49	urocanate_hydratase;	123	1	0	0
4.2.1.55	3-hydroxybutyryl-CoA_dehydratase;	45	1	0	0
4.2.1.58	crotonoyl-[acyl-carrier-protein]_hydratase;	1	1	NA	NA
4.2.1.6	galactonate_dehydratase;	23	1	0	0
4.2.1.60	3-hydroxydecanoyl-[acyl-carrier-protein]_dehydratase;	47	1	0	0
4.2.1.61	3-hydroxypalmitoyl-[acyl-carrier-protein]_dehydratase;	1	1	NA	NA
4.2.1.7	altronate_dehydratase;	53	1	0	0
4.2.1.70	pseudouridylate_synthase;	90	1	0	0
4.2.1.79	2-methylcitrate_dehydratase;	3	1	0	0
4.2.1.8	mannonate_dehydratase;	76	1	0	0
4.2.1.80	2-oxopent-4-enoate_hydratase;	24	1	0	0
4.2.1.83	4-oxalmesaconate_hydratase;	3	1	0	0
4.2.1.84	nitrile_hydratase;	16	1	0	0
4.2.1.99	2-methylisocitrate_dehydratase;	3	1	0	0
4.2.2.2	pectate_lyase;	7	1	0	0
4.2.2.6	oligogalacturonide_lyase;	9	1	0	0
4.2.3.3	methylglyoxal_synthase;	91	1	0	0
4.3.1.1	aspartate_ammonia-lyase;	170	1	0	0
4.3.1.18	D-serine_ammonia-lyase;	82	1	0	0
4.3.1.2	methylaspartate_ammonia-lyase;	13	1	0	0
4.3.1.7	ethanolamine_ammonia-lyase;	100	1	0	0
4.4.1.15	D-cysteine_desulfhydrase;	62	1	0	0
4.4.1.2	homocysteine_desulfhydrase;	1	1	NA	NA
4.4.1.22	S-(hydroxymethyl)glutathione_synthase;	17	1	0	0
4.4.1.5	lactoylglutathione_lyase;	176	1	0	0
4.6.1.-	no_name	1	1	NA	NA
4.6.1.1	adenylate_cyclase;	25	1	0	0
4.6.1.13	phosphatidylinositol_diacylglycerol-lyase;	1	1	NA	NA
4.6.1.2	guanylate_cyclase;	2	1	0	0
4.99.1.-	no_name	3	1	0	0
4.99.1.3	sirohydrochlorin_cobaltochelatase;	16	1	0	0
4.99.1.7	phenylacetaldoxime_dehydratase;	4	1	0	0
5.-.-.-	no_name	375	1	0	0
5.1.1.11	phenylalanine_racemase_(ATP-hydrolysing);	7	1	0	0
5.1.1.12	ornithine_racemase	3	1	0	0
5.1.1.13	aspartate_racemase;	84	1	0	0
5.1.2.3	3-hydroxybutyryl-CoA_epimerase;	38	1	0	0
5.1.3.-	no_name	5	1	0	0
5.1.3.12	UDP-glucuronate_5-epimerase;	14	1	0	0
5.1.3.13	dTDP-4-dehydrorhamnose_3,5-epimerase;	202	1	0	0
5.1.3.15	glucose-6-phosphate_1-epimerase	1	1	NA	NA
5.1.3.2	UDP-glucose_4-epimerase;	274	1	0	0
5.1.3.22	L-ribulose-5-phosphate_3-epimerase;	28	1	0	0
5.1.3.3	aldose_1-epimerase;	168	1	0	0
5.1.3.4	L-ribulose-5-phosphate_4-epimerase;	106	1	0	0
5.1.3.6	UDP-glucuronate_4-epimerase;	1	1	NA	NA
5.1.3.7	UDP-N-acetylglucosamine_4-epimerase;	13	1	0	0
5.1.99.1	methylmalonyl-CoA_epimerase;	17	1	0	0
5.2.1.1	maleate_isomerase	5	1	0	0
5.2.1.2	maleylacetoacetate_isomerase;	53	1	0	0
5.2.1.4	maleylpyruvate_isomerase	3	1	0	0
5.3.1.-	no_name	17	1	0	0
5.3.1.12	glucuronate_isomerase;	51	1	0	0
5.3.1.14	L-rhamnose_isomerase;	40	1	0	0
5.3.1.17	4-deoxy-L-threo-5-hexosulose-uronate_ketol-isomerase;	50	1	0	0
5.3.1.22	hydroxypyruvate_isomerase	82	1	0	0
5.3.1.25	L-fucose_isomerase	14	1	0	0
5.3.1.26	galactose-6-phosphate_isomerase	43	1	0	0
5.3.1.4	L-arabinose_isomerase	54	1	0	0
5.3.2.-	no_name	31	1	0	0
5.3.3.-	no_name	56	1	0	0
5.3.3.10	5-carboxymethyl-2-hydroxymuconate_Delta-isomerase	52	1	0	0
5.3.3.3	vinylacetyl-CoA_Delta-isomerase;	3	1	0	0
5.3.3.4	muconolactone_Delta-isomerase;	29	1	0	0
5.4.2.3	phosphoacetylglucosamine_mutase;	1	1	NA	NA
5.4.2.4	bisphosphoglycerate_mutase;	1	1	NA	NA
5.4.2.6	beta-phosphoglucomutase	66	1	0	0
5.4.2.7	phosphopentomutase;	198	1	0	0
5.4.2.9	phosphoenolpyruvate_mutase;	33	1	0	0
5.4.4.2	isochorismate_synthase	174	1	0	0
5.4.99.1	methylaspartate_mutase;	13	1	0	0
5.4.99.16	maltose_alpha-D-glucosyltransferase;	26	1	0	0
5.4.99.2	methylmalonyl-CoA_mutase;	138	1	0	0
5.5.1.-	no_name	3	1	0	0
5.5.1.1	muconate_cycloisomerase;	28	1	0	0
5.5.1.2	3-carboxy-cis,cis-muconate_cycloisomerase;	35	1	0	0
5.5.1.4	inositol-3-phosphate_synthase;	11	1	0	0
5.5.1.7	chloromuconate_cycloisomerase;	2	1	0	0
6.1.1.23	aspartate---tRNAAsn_ligase;	2	1	0	0
6.2.1.-	no_name	96	1	0	0
6.2.1.11	biotin---CoA_ligase;	1	1	NA	NA
6.2.1.13	acetate---CoA_ligase_(ADP-forming);	12	1	0	0
6.2.1.14	6-carboxyhexanoate---CoA_ligase;	23	1	0	0
6.2.1.16	acetoacetate---CoA_ligase;	36	1	0	0
6.2.1.17	propionate---CoA_ligase;	59	1	0	0
6.2.1.20	long-chain-fatty-acid---[acyl-carrier-protein]_ligase;	70	1	0	0
6.2.1.25	benzoate---CoA_ligase;	15	1	0	0
6.2.1.27	4-hydroxybenzoate---CoA_ligase;	1	1	NA	NA
6.2.1.6	glutarate---CoA_ligase;	1	1	NA	NA
6.2.1.9	malate---CoA_ligase;	1	1	NA	NA
6.3.1.1	aspartate---ammonia_ligase;	103	1	0	0
6.3.1.11	glutamate---putrescine_ligase;	10	1	0	0
6.3.1.5	NAD+_synthase;	130	1	0	0
6.3.1.8	glutathionylspermidine_synthase;	25	1	0	0
6.3.2.1	pantoate---beta-alanine_ligase;	278	1	0	0
6.3.2.12	dihydrofolate_synthase;	173	1	0	0
6.3.2.17	tetrahydrofolate_synthase;	298	1	0	0
6.3.2.5	phosphopantothenate---cysteine_ligase;	355	1	0	0
6.3.2.6	phosphoribosylaminoimidazolesuccinocarboxamide_synthase;	381	1	0	0
6.3.2.7	UDP-N-acetylmuramoyl-L-alanyl-D-glutamate---L-lysine_ligase;	4	1	0	0
6.3.2.8	UDP-N-acetylmuramate---L-alanine_ligase;	4	1	0	0
6.3.2.9	UDP-N-acetylmuramoyl-L-alanine---D-glutamate_ligase;	4	1	0	0
6.3.3.1	phosphoribosylformylglycinamidine_cyclo-ligase;	379	1	0	0
6.3.3.3	dethiobiotin_synthase;	263	1	0	0
6.3.4.1	GMP_synthase;	6	1	0	0
6.3.4.13	phosphoribosylamine---glycine_ligase;	356	1	0	0
6.3.4.14	biotin_carboxylase;	314	1	0	0
6.3.4.15	biotin---[acetyl-CoA-carboxylase]_ligase;	374	1	0	0
6.3.4.6	urea_carboxylase;	21	1	0	0
6.3.5.3	phosphoribosylformylglycinamidine_synthase;	378	1	0	0
6.3.5.6	asparaginyl-tRNA_synthase_(glutamine-hydrolysing);	334	1	0	0
6.3.5.7	glutaminyl-tRNA_synthase_(glutamine-hydrolysing);	334	1	0	0
6.4.1.-	no_name	8	1	0	0
6.4.1.3	propionyl-CoA_carboxylase;	28	1	0	0
1.1.1.101	acylglycerone-phosphate_reductase;	0	NA	NA	NA
1.1.1.102	3-dehydrosphinganine_reductase;	0	NA	NA	NA
1.1.1.104	4-oxoproline_reductase;	0	NA	NA	NA
1.1.1.105	retinol_dehydrogenase;	0	NA	NA	NA
1.1.1.106	pantoate_4-dehydrogenase;	0	NA	NA	NA
1.1.1.107	pyridoxal_4-dehydrogenase;	0	NA	NA	NA
1.1.1.110	indolelactate_dehydrogenase;	0	NA	NA	NA
1.1.1.12	L-arabinitol_4-dehydrogenase;	0	NA	NA	NA
1.1.1.120	galactose_1-dehydrogenase_(NADP+);	0	NA	NA	NA
1.1.1.127	2-dehydro-3-deoxy-D-gluconate_5-dehydrogenase;	0	NA	NA	NA
1.1.1.129	L-threonate_3-dehydrogenase;	0	NA	NA	NA
1.1.1.132	GDP-mannose_6-dehydrogenase;	0	NA	NA	NA
1.1.1.134	dTDP-6-deoxy-L-talose_4-dehydrogenase;	0	NA	NA	NA
1.1.1.135	GDP-6-deoxy-D-talose_4-dehydrogenase;	0	NA	NA	NA
1.1.1.136	UDP-N-acetylglucosamine_6-dehydrogenase;	0	NA	NA	NA
1.1.1.138	mannitol_2-dehydrogenase_(NADP+);	0	NA	NA	NA
1.1.1.144	perillyl-alcohol_dehydrogenase;	0	NA	NA	NA
1.1.1.145	3beta-hydroxy-Delta5-steroid_dehydrogenase;	0	NA	NA	NA
1.1.1.146	11beta-hydroxysteroid_dehydrogenase;	0	NA	NA	NA
1.1.1.148	estradiol_17alpha-dehydrogenase;	0	NA	NA	NA
1.1.1.149	20alpha-hydroxysteroid_dehydrogenase;	0	NA	NA	NA
1.1.1.152	3alpha-hydroxy-5beta-androstane-17-one_3alpha-dehydrogenase;	0	NA	NA	NA
1.1.1.153	sepiapterin_reductase;	0	NA	NA	NA
1.1.1.156	glycerol_2-dehydrogenase_(NADP+);	0	NA	NA	NA
1.1.1.16	galactitol_2-dehydrogenase;	0	NA	NA	NA
1.1.1.161	cholestanetetraol_26-dehydrogenase;	0	NA	NA	NA
1.1.1.170	sterol-4alpha-carboxylate_3-dehydrogenase_(decarboxylating);	0	NA	NA	NA
1.1.1.173	L-rhamnose_1-dehydrogenase	0	NA	NA	NA
1.1.1.174	cyclohexane-1,2-diol_dehydrogenase	0	NA	NA	NA
1.1.1.175	D-xylose_1-dehydrogenase;	0	NA	NA	NA
1.1.1.181	cholest-5-ene-3beta,7alpha-diol_3beta-dehydrogenase;	0	NA	NA	NA
1.1.1.183	geraniol_dehydrogenase	0	NA	NA	NA
1.1.1.184	carbonyl_reductase_(NADPH);	0	NA	NA	NA
1.1.1.186	dTDP-galactose_6-dehydrogenase;	0	NA	NA	NA
1.1.1.187	GDP-4-dehydro-D-rhamnose_reductase;	0	NA	NA	NA
1.1.1.188	prostaglandin-F_synthase;	0	NA	NA	NA
1.1.1.189	prostaglandin-E2_9-reductase;	0	NA	NA	NA
1.1.1.19	glucuronate_reductase;	0	NA	NA	NA
1.1.1.190	indole-3-acetaldehyde_reductase_(NADH);	0	NA	NA	NA
1.1.1.191	indole-3-acetaldehyde_reductase_(NADPH);	0	NA	NA	NA
1.1.1.192	long-chain-alcohol_dehydrogenase;	0	NA	NA	NA
1.1.1.195	cinnamyl-alcohol_dehydrogenase;	0	NA	NA	NA
1.1.1.196	15-hydroxyprostaglandin-D_dehydrogenase_(NADP+);	0	NA	NA	NA
1.1.1.202	1,3-propanediol_dehydrogenase;	0	NA	NA	NA
1.1.1.206	tropinone_reductase_I;	0	NA	NA	NA
1.1.1.207	(-)-menthol_dehydrogenase;	0	NA	NA	NA
1.1.1.208	(+)-neomenthol_dehydrogenase;	0	NA	NA	NA
1.1.1.218	morphine_6-dehydrogenase;	0	NA	NA	NA
1.1.1.219	dihydrokaempferol_4-reductase;	0	NA	NA	NA
1.1.1.220	6-pyruvoyltetrahydropterin_2-reductase;	0	NA	NA	NA
1.1.1.222	(R)-4-hydroxyphenyllactate_dehydrogenase;	0	NA	NA	NA
1.1.1.223	isopiperitenol_dehydrogenase	0	NA	NA	NA
1.1.1.232	15-hydroxyicosatetraenoate_dehydrogenase;	0	NA	NA	NA
1.1.1.234	flavanone_4-reductase	0	NA	NA	NA
1.1.1.236	tropinone_reductase_II;	0	NA	NA	NA
1.1.1.237	hydroxyphenylpyruvate_reductase;	0	NA	NA	NA
1.1.1.239	3alpha(17beta)-hydroxysteroid_dehydrogenase_(NAD+);	0	NA	NA	NA
1.1.1.24	quinate_dehydrogenase;	0	NA	NA	NA
1.1.1.241	6-endo-hydroxycineole_dehydrogenase	0	NA	NA	NA
1.1.1.243	carveol_dehydrogenase;	0	NA	NA	NA
1.1.1.245	cyclohexanol_dehydrogenase	0	NA	NA	NA
1.1.1.246	pterocarpin_synthase;	0	NA	NA	NA
1.1.1.247	codeinone_reductase_(NADPH)	0	NA	NA	NA
1.1.1.248	salutaridine_reductase_(NADPH)	0	NA	NA	NA
1.1.1.256	fluoren-9-ol_dehydrogenase	0	NA	NA	NA
1.1.1.257	4-(hydroxymethyl)benzenesulfonate_dehydrogenase	0	NA	NA	NA
1.1.1.258	6-hydroxyhexanoate_dehydrogenase	0	NA	NA	NA
1.1.1.259	3-hydroxypimeloyl-CoA_dehydrogenase	0	NA	NA	NA
1.1.1.262	4-hydroxythreonine-4-phosphate_dehydrogenase;	0	NA	NA	NA
1.1.1.266	dTDP-4-dehydro-6-deoxyglucose_reductase;	0	NA	NA	NA
1.1.1.267	1-deoxy-D-xylulose-5-phosphate_reductoisomerase;	0	NA	NA	NA
1.1.1.270	3-keto-steroid_reductase;	0	NA	NA	NA
1.1.1.271	GDP-L-fucose_synthase;	0	NA	NA	NA
1.1.1.273	vellosimine_dehydrogenase	0	NA	NA	NA
1.1.1.275	(+)-trans-carveol_dehydrogenase;	0	NA	NA	NA
1.1.1.281	GDP-4-dehydro-6-deoxy-D-mannose_reductase;	0	NA	NA	NA
1.1.1.288	xanthoxin_dehydrogenase;	0	NA	NA	NA
1.1.1.291	2-hydroxymethylglutarate_dehydrogenase;	0	NA	NA	NA
1.1.1.34	hydroxymethylglutaryl-CoA_reductase_(NADPH);	0	NA	NA	NA
1.1.1.4	(R,R)-butanediol_dehydrogenase;	0	NA	NA	NA
1.1.1.45	L-gulonate_3-dehydrogenase;	0	NA	NA	NA
1.1.1.46	L-arabinose_1-dehydrogenase	0	NA	NA	NA
1.1.1.48	galactose_1-dehydrogenase;	0	NA	NA	NA
1.1.1.5	acetoin_dehydrogenase;	0	NA	NA	NA
1.1.1.50	3alpha-hydroxysteroid_dehydrogenase_(B-specific);	0	NA	NA	NA
1.1.1.51	3(or_17)beta-hydroxysteroid_dehydrogenase;	0	NA	NA	NA
1.1.1.53	3alpha(or_20beta)-hydroxysteroid_dehydrogenase;	0	NA	NA	NA
1.1.1.59	3-hydroxypropionate_dehydrogenase	0	NA	NA	NA
1.1.1.62	estradiol_17beta-dehydrogenase;	0	NA	NA	NA
1.1.1.63	testosterone_17beta-dehydrogenase;	0	NA	NA	NA
1.1.1.64	testosterone_17beta-dehydrogenase_(NADP+);	0	NA	NA	NA
1.1.1.65	pyridoxine_4-dehydrogenase;	0	NA	NA	NA
1.1.1.71	alcohol_dehydrogenase_[NAD(P)+];	0	NA	NA	NA
1.1.1.75	(R)-aminopropanol_dehydrogenase;	0	NA	NA	NA
1.1.1.76	(S,S)-butanediol_dehydrogenase;	0	NA	NA	NA
1.1.1.78	methylglyoxal_reductase_(NADH-dependent);	0	NA	NA	NA
1.1.1.80	isopropanol_dehydrogenase_(NADP+);	0	NA	NA	NA
1.1.1.84	dimethylmalate_dehydrogenase;	0	NA	NA	NA
1.1.1.92	oxaloglycolate_reductase_(decarboxylating)	0	NA	NA	NA
1.1.1.97	3-hydroxybenzyl-alcohol_dehydrogenase;	0	NA	NA	NA
1.1.2.2	mannitol_dehydrogenase_(cytochrome);	0	NA	NA	NA
1.1.2.5	D-lactate_dehydrogenase_(cytochrome_c-553)	0	NA	NA	NA
1.1.3.-	no_name	0	NA	NA	NA
1.1.3.10	pyranose_oxidase;	0	NA	NA	NA
1.1.3.12	pyridoxine_4-oxidase;	0	NA	NA	NA
1.1.3.13	alcohol_oxidase;	0	NA	NA	NA
1.1.3.17	choline_oxidase	0	NA	NA	NA
1.1.3.23	thiamine_oxidase;	0	NA	NA	NA
1.1.3.3	malate_oxidase;	0	NA	NA	NA
1.1.3.38	vanillyl-alcohol_oxidase;	0	NA	NA	NA
1.1.3.4	glucose_oxidase;	0	NA	NA	NA
1.1.3.5	hexose_oxidase	0	NA	NA	NA
1.1.3.6	cholesterol_oxidase;	0	NA	NA	NA
1.1.3.8	L-gulonolactone_oxidase;	0	NA	NA	NA
1.1.4.1	vitamin-K-epoxide_reductase_(warfarin-sensitive)	0	NA	NA	NA
1.1.99.-	no_name	0	NA	NA	NA
1.1.99.20	alkan-1-ol_dehydrogenase_(acceptor);	0	NA	NA	NA
1.1.99.3	gluconate_2-dehydrogenase_(acceptor);	0	NA	NA	NA
1.1.99.7	lactate---malate_transhydrogenase;	0	NA	NA	NA
1.1.99.9	pyridoxine_5-dehydrogenase;	0	NA	NA	NA
1.10.3.1	catechol_oxidase;	0	NA	NA	NA
1.10.3.3	L-ascorbate_oxidase;	0	NA	NA	NA
1.10.3.4	o-aminophenol_oxidase;	0	NA	NA	NA
1.10.99.3	violaxanthin_de-epoxidase;	0	NA	NA	NA
1.11.1.11	L-ascorbate_peroxidase;	0	NA	NA	NA
1.11.1.12	phospholipid-hydroperoxide_glutathione_peroxidase;	0	NA	NA	NA
1.11.1.8	iodide_peroxidase;	0	NA	NA	NA
1.12.7.2	ferredoxin_hydrogenase;	0	NA	NA	NA
1.12.98.1	coenzyme_F420_hydrogenase;	0	NA	NA	NA
1.13.11.10	7,8-dihydroxykynurenate_8,8a-dioxygenase;	0	NA	NA	NA
1.13.11.12	lipoxygenase;	0	NA	NA	NA
1.13.11.13	ascorbate_2,3-dioxygenase;	0	NA	NA	NA
1.13.11.14	2,3-dihydroxybenzoate_3,4-dioxygenase;	0	NA	NA	NA
1.13.11.17	indole_2,3-dioxygenase;	0	NA	NA	NA
1.13.11.18	sulfur_dioxygenase;	0	NA	NA	NA
1.13.11.19	cysteamine_dioxygenase;	0	NA	NA	NA
1.13.11.22	caffeate_3,4-dioxygenase	0	NA	NA	NA
1.13.11.23	2,3-dihydroxyindole_2,3-dioxygenase	0	NA	NA	NA
1.13.11.29	stizolobate_synthase	0	NA	NA	NA
1.13.11.30	stizolobinate_synthase	0	NA	NA	NA
1.13.11.31	arachidonate_12-lipoxygenase;	0	NA	NA	NA
1.13.11.33	arachidonate_15-lipoxygenase;	0	NA	NA	NA
1.13.11.34	arachidonate_5-lipoxygenase;	0	NA	NA	NA
1.13.11.38	1-hydroxy-2-naphthoate_1,2-dioxygenase;	0	NA	NA	NA
1.13.11.40	arachidonate_8-lipoxygenase;	0	NA	NA	NA
1.13.11.44	linoleate_diol_synthase;	0	NA	NA	NA
1.13.11.45	linoleate_11-lipoxygenase;	0	NA	NA	NA
1.13.11.51	9-cis-epoxycarotenoid_dioxygenase;	0	NA	NA	NA
1.13.11.52	indoleamine_2,3-dioxygenase;	0	NA	NA	NA
1.13.11.6	3-hydroxyanthranilate_3,4-dioxygenase;	0	NA	NA	NA
1.13.11.9	2,5-dihydroxypyridine_5,6-dioxygenase;	0	NA	NA	NA
1.13.12.1	arginine_2-monooxygenase;	0	NA	NA	NA
1.13.12.2	lysine_2-monooxygenase;	0	NA	NA	NA
1.13.12.3	tryptophan_2-monooxygenase	0	NA	NA	NA
1.13.12.9	phenylalanine_2-monooxygenase;	0	NA	NA	NA
1.13.99.-	no_name	0	NA	NA	NA
1.13.99.1	inositol_oxygenase;	0	NA	NA	NA
1.13.99.3	tryptophan_2-dioxygenase;	0	NA	NA	NA
1.14.11.-	no_name	0	NA	NA	NA
1.14.11.1	gamma-butyrobetaine_dioxygenase;	0	NA	NA	NA
1.14.11.11	hyoscyamine_(6S)-dioxygenase;	0	NA	NA	NA
1.14.11.12	gibberellin-44_dioxygenase;	0	NA	NA	NA
1.14.11.13	gibberellin_2beta-dioxygenase;	0	NA	NA	NA
1.14.11.14	6beta-hydroxyhyoscyamine_epoxidase;	0	NA	NA	NA
1.14.11.15	gibberellin_3beta-dioxygenase;	0	NA	NA	NA
1.14.11.19	leucocyanidin_oxygenase;	0	NA	NA	NA
1.14.11.20	deacetoxyvindoline_4-hydroxylase;	0	NA	NA	NA
1.14.11.21	clavaminate_synthase;	0	NA	NA	NA
1.14.11.22	flavone_synthase	0	NA	NA	NA
1.14.11.23	flavonol_synthase	0	NA	NA	NA
1.14.11.26	deacetoxycephalosporin-C_hydroxylase;	0	NA	NA	NA
1.14.11.4	procollagen-lysine_5-dioxygenase;	0	NA	NA	NA
1.14.11.8	trimethyllysine_dioxygenase;	0	NA	NA	NA
1.14.11.9	flavanone_3-dioxygenase;	0	NA	NA	NA
1.14.12.11	toluene_dioxygenase;	0	NA	NA	NA
1.14.12.12	naphthalene_1,2-dioxygenase;	0	NA	NA	NA
1.14.12.14	2-aminobenzenesulfonate_2,3-dioxygenase;	0	NA	NA	NA
1.14.12.15	terephthalate_1,2-dioxygenase;	0	NA	NA	NA
1.14.12.3	benzene_1,2-dioxygenase;	0	NA	NA	NA
1.14.12.4	3-hydroxy-2-methylpyridinecarboxylate_dioxygenase;	0	NA	NA	NA
1.14.12.5	5-pyridoxate_dioxygenase;	0	NA	NA	NA
1.14.12.7	phthalate_4,5-dioxygenase;	0	NA	NA	NA
1.14.12.8	4-sulfobenzoate_3,4-dioxygenase;	0	NA	NA	NA
1.14.13.10	2,6-dihydroxypyridine_3-monooxygenase;	0	NA	NA	NA
1.14.13.11	trans-cinnamate_4-monooxygenase;	0	NA	NA	NA
1.14.13.13	calcidiol_1-monooxygenase;	0	NA	NA	NA
1.14.13.14	trans-cinnamate_2-monooxygenase;	0	NA	NA	NA
1.14.13.15	cholestanetriol_26-monooxygenase;	0	NA	NA	NA
1.14.13.17	cholesterol_7alpha-monooxygenase;	0	NA	NA	NA
1.14.13.18	4-hydroxyphenylacetate_1-monooxygenase;	0	NA	NA	NA
1.14.13.20	2,4-dichlorophenol_6-monooxygenase;	0	NA	NA	NA
1.14.13.21	flavonoid_3-monooxygenase;	0	NA	NA	NA
1.14.13.22	cyclohexanone_monooxygenase;	0	NA	NA	NA
1.14.13.23	3-hydroxybenzoate_4-monooxygenase;	0	NA	NA	NA
1.14.13.27	4-aminobenzoate_1-monooxygenase;	0	NA	NA	NA
1.14.13.28	3,9-dihydroxypterocarpan_6a-monooxygenase;	0	NA	NA	NA
1.14.13.29	4-nitrophenol_2-monooxygenase;	0	NA	NA	NA
1.14.13.30	leukotriene-B4_20-monooxygenase;	0	NA	NA	NA
1.14.13.33	4-hydroxybenzoate_3-monooxygenase_[NAD(P)H];	0	NA	NA	NA
1.14.13.34	leukotriene-E4_20-monooxygenase;	0	NA	NA	NA
1.14.13.35	anthranilate_3-monooxygenase_(deaminating);	0	NA	NA	NA
1.14.13.36	5-O-(4-coumaroyl)-D-quinate_3-monooxygenase;	0	NA	NA	NA
1.14.13.37	methyltetrahydroprotoberberine_14-monooxygenase;	0	NA	NA	NA
1.14.13.38	anhydrotetracycline_monooxygenase;	0	NA	NA	NA
1.14.13.4	melilotate_3-monooxygenase;	0	NA	NA	NA
1.14.13.40	anthraniloyl-CoA_monooxygenase;	0	NA	NA	NA
1.14.13.41	tyrosine_N-monooxygenase;	0	NA	NA	NA
1.14.13.47	(S)-limonene_3-monooxygenase;	0	NA	NA	NA
1.14.13.48	(S)-limonene_6-monooxygenase;	0	NA	NA	NA
1.14.13.49	(S)-limonene_7-monooxygenase;	0	NA	NA	NA
1.14.13.5	imidazoleacetate_4-monooxygenase;	0	NA	NA	NA
1.14.13.50	pentachlorophenol_monooxygenase;	0	NA	NA	NA
1.14.13.51	6-oxocineole_dehydrogenase;	0	NA	NA	NA
1.14.13.52	isoflavone_3-hydroxylase;	0	NA	NA	NA
1.14.13.53	4-methoxyisoflavone_2-hydroxylase;	0	NA	NA	NA
1.14.13.55	protopine_6-monooxygenase;	0	NA	NA	NA
1.14.13.56	dihydrosanguinarine_10-monooxygenase;	0	NA	NA	NA
1.14.13.57	dihydrochelirubine_12-monooxygenase;	0	NA	NA	NA
1.14.13.59	L-lysine_6-monooxygenase_(NADPH);	0	NA	NA	NA
1.14.13.63	3-hydroxyphenylacetate_6-hydroxylase;	0	NA	NA	NA
1.14.13.64	4-hydroxybenzoate_1-hydroxylase;	0	NA	NA	NA
1.14.13.68	4-hydroxyphenylacetaldehyde_oxime_monooxygenase;	0	NA	NA	NA
1.14.13.69	alkene_monooxygenase;	0	NA	NA	NA
1.14.13.70	sterol_14-demethylase;	0	NA	NA	NA
1.14.13.72	methylsterol_monooxygenase;	0	NA	NA	NA
1.14.13.73	tabersonine_16-hydroxylase;	0	NA	NA	NA
1.14.13.74	7-deoxyloganin_7-hydroxylase	0	NA	NA	NA
1.14.13.75	vinorine_hydroxylase	0	NA	NA	NA
1.14.13.76	taxane_10beta-hydroxylase	0	NA	NA	NA
1.14.13.77	taxane_13alpha-hydroxylase	0	NA	NA	NA
1.14.13.78	ent-kaurene_oxidase	0	NA	NA	NA
1.14.13.79	ent-kaurenoic_acid_oxidase	0	NA	NA	NA
1.14.13.80	(R)-limonene_6-monooxygenase;	0	NA	NA	NA
1.14.13.81	magnesium-protoporphyrin_IX_monomethyl_ester_(oxidative)_cyclase;	0	NA	NA	NA
1.14.13.83	precorrin-3B_synthase;	0	NA	NA	NA
1.14.13.84	4-hydroxyacetophenone_monooxygenase;	0	NA	NA	NA
1.14.13.85	glyceollin_synthase	0	NA	NA	NA
1.14.13.86	2-hydroxyisoflavanone_synthase	0	NA	NA	NA
1.14.13.88	flavonoid_3,5-hydroxylase	0	NA	NA	NA
1.14.13.89	isoflavone_2-hydroxylase;	0	NA	NA	NA
1.14.13.9	kynurenine_3-monooxygenase;	0	NA	NA	NA
1.14.13.90	zeaxanthin_epoxidase;	0	NA	NA	NA
1.14.13.93	(+)-abscisic_acid_8-hydroxylase;	0	NA	NA	NA
1.14.14.-	no_name	0	NA	NA	NA
1.14.15.-	no_name	0	NA	NA	NA
1.14.15.4	steroid_11beta-monooxygenase;	0	NA	NA	NA
1.14.15.5	corticosterone_18-monooxygenase;	0	NA	NA	NA
1.14.15.6	cholesterol_monooxygenase_(side-chain-cleaving);	0	NA	NA	NA
1.14.15.7	choline_monooxygenase	0	NA	NA	NA
1.14.16.-	no_name	0	NA	NA	NA
1.14.16.2	tyrosine_3-monooxygenase;	0	NA	NA	NA
1.14.16.3	anthranilate_3-monooxygenase;	0	NA	NA	NA
1.14.16.4	tryptophan_5-monooxygenase;	0	NA	NA	NA
1.14.17.1	dopamine_beta-monooxygenase;	0	NA	NA	NA
1.14.18.-	no_name	0	NA	NA	NA
1.14.18.1	monophenol_monooxygenase;	0	NA	NA	NA
1.14.18.2	CMP-N-acetylneuraminate_monooxygenase;	0	NA	NA	NA
1.14.19.-	no_name	0	NA	NA	NA
1.14.19.1	stearoyl-CoA_9-desaturase;	0	NA	NA	NA
1.14.19.2	acyl-[acyl-carrier-protein]_desaturase;	0	NA	NA	NA
1.14.19.3	linoleoyl-CoA_desaturase;	0	NA	NA	NA
1.14.20.1	deacetoxycephalosporin-C_synthase;	0	NA	NA	NA
1.14.21.1	(S)-stylopine_synthase;	0	NA	NA	NA
1.14.21.2	(S)-cheilanthifoline_synthase;	0	NA	NA	NA
1.14.21.3	berbamunine_synthase;	0	NA	NA	NA
1.14.21.4	salutaridine_synthase;	0	NA	NA	NA
1.14.21.5	(S)-canadine_synthase;	0	NA	NA	NA
1.14.21.6	lathosterol_oxidase;	0	NA	NA	NA
1.14.99.1	prostaglandin-endoperoxide_synthase;	0	NA	NA	NA
1.14.99.10	steroid_21-monooxygenase;	0	NA	NA	NA
1.14.99.11	estradiol_6beta-monooxygenase;	0	NA	NA	NA
1.14.99.12	androst-4-ene-3,17-dione_monooxygenase;	0	NA	NA	NA
1.14.99.14	progesterone_11alpha-monooxygenase;	0	NA	NA	NA
1.14.99.15	4-methoxybenzoate_monooxygenase_(O-demethylating);	0	NA	NA	NA
1.14.99.19	plasmanylethanolamine_desaturase;	0	NA	NA	NA
1.14.99.2	kynurenine_7,8-hydroxylase;	0	NA	NA	NA
1.14.99.23	3-hydroxybenzoate_2-monooxygenase;	0	NA	NA	NA
1.14.99.3	heme_oxygenase;	0	NA	NA	NA
1.14.99.30	carotene_7,8-desaturase;	0	NA	NA	NA
1.14.99.33	Delta12-fatty_acid_dehydrogenase;	0	NA	NA	NA
1.14.99.36	beta-carotene_15,15-monooxygenase;	0	NA	NA	NA
1.14.99.37	taxadiene_5alpha-hydroxylase	0	NA	NA	NA
1.14.99.7	squalene_monooxygenase;	0	NA	NA	NA
1.14.99.9	steroid_17alpha-monooxygenase;	0	NA	NA	NA
1.16.1.2	diferric-transferrin_reductase;	0	NA	NA	NA
1.16.1.3	aquacobalamin_reductase;	0	NA	NA	NA
1.16.1.4	cob(II)alamin_reductase;	0	NA	NA	NA
1.16.1.5	aquacobalamin_reductase_(NADPH);	0	NA	NA	NA
1.16.1.6	cyanocobalamin_reductase_(cyanide-eliminating);	0	NA	NA	NA
1.16.3.1	ferroxidase;	0	NA	NA	NA
1.16.8.1	cob(II)yrinic_acid_a,c-diamide_reductase;	0	NA	NA	NA
1.17.1.1	CDP-4-dehydro-6-deoxyglucose_reductase;	0	NA	NA	NA
1.17.1.2	4-hydroxy-3-methylbut-2-enyl_diphosphate_reductase;	0	NA	NA	NA
1.17.1.3	leucoanthocyanidin_reductase;	0	NA	NA	NA
1.17.1.5	nicotinate_dehydrogenase;	0	NA	NA	NA
1.17.3.2	xanthine_oxidase;	0	NA	NA	NA
1.17.3.3	6-hydroxynicotinate_dehydrogenase;	0	NA	NA	NA
1.17.4.3	4-hydroxy-3-methylbut-2-en-1-yl_diphosphate_synthase	0	NA	NA	NA
1.17.5.-	no_name	0	NA	NA	NA
1.17.99.-	no_name	0	NA	NA	NA
1.17.99.2	ethylbenzene_hydroxylase;	0	NA	NA	NA
1.17.99.4	uracil/thymine_dehydrogenase;	0	NA	NA	NA
1.18.-.-	no_name	0	NA	NA	NA
1.18.1.1	rubredoxin-NAD+_reductase;	0	NA	NA	NA
1.18.1.4	rubredoxin-NAD(P)+_reductase;	0	NA	NA	NA
1.2.-.-	no_name	0	NA	NA	NA
1.2.1.15	malonate-semialdehyde_dehydrogenase	0	NA	NA	NA
1.2.1.17	glyoxylate_dehydrogenase_(acylating)	0	NA	NA	NA
1.2.1.20	glutarate-semialdehyde_dehydrogenase;	0	NA	NA	NA
1.2.1.23	2-oxoaldehyde_dehydrogenase_(NAD+);	0	NA	NA	NA
1.2.1.29	aryl-aldehyde_dehydrogenase	0	NA	NA	NA
1.2.1.33	(R)-dehydropantoate_dehydrogenase;	0	NA	NA	NA
1.2.1.36	retinal_dehydrogenase;	0	NA	NA	NA
1.2.1.4	aldehyde_dehydrogenase_(NADP+);	0	NA	NA	NA
1.2.1.40	3alpha,7alpha,12alpha-trihydroxycholestan-26-al_26-oxidoreductase;	0	NA	NA	NA
1.2.1.44	cinnamoyl-CoA_reductase;	0	NA	NA	NA
1.2.1.47	4-trimethylammoniobutyraldehyde_dehydrogenase;	0	NA	NA	NA
1.2.1.48	long-chain-aldehyde_dehydrogenase;	0	NA	NA	NA
1.2.1.49	2-oxoaldehyde_dehydrogenase_(NADP+);	0	NA	NA	NA
1.2.1.51	pyruvate_dehydrogenase_(NADP+);	0	NA	NA	NA
1.2.1.53	4-hydroxyphenylacetaldehyde_dehydrogenase;	0	NA	NA	NA
1.2.1.54	gamma-guanidinobutyraldehyde_dehydrogenase;	0	NA	NA	NA
1.2.1.57	butanal_dehydrogenase	0	NA	NA	NA
1.2.1.61	4-hydroxymuconic-semialdehyde_dehydrogenase	0	NA	NA	NA
1.2.1.62	4-formylbenzenesulfonate_dehydrogenase	0	NA	NA	NA
1.2.1.64	4-hydroxybenzaldehyde_dehydrogenase;	0	NA	NA	NA
1.2.1.67	vanillin_dehydrogenase	0	NA	NA	NA
1.2.1.7	benzaldehyde_dehydrogenase_(NADP+);	0	NA	NA	NA
1.2.3.-	no_name	0	NA	NA	NA
1.2.3.1	aldehyde_oxidase;	0	NA	NA	NA
1.2.3.11	retinal_oxidase;	0	NA	NA	NA
1.2.3.13	4-hydroxyphenylpyruvate_oxidase	0	NA	NA	NA
1.2.3.4	oxalate_oxidase;	0	NA	NA	NA
1.2.3.5	glyoxylate_oxidase	0	NA	NA	NA
1.2.3.6	pyruvate_oxidase_(CoA-acetylating)	0	NA	NA	NA
1.2.3.7	indole-3-acetaldehyde_oxidase;	0	NA	NA	NA
1.2.3.8	pyridoxal_oxidase	0	NA	NA	NA
1.2.7.2	2-oxobutyrate_synthase;	0	NA	NA	NA
1.2.7.4	carbon-monoxide_dehydrogenase_(ferredoxin)	0	NA	NA	NA
1.2.99.5	formylmethanofuran_dehydrogenase;	0	NA	NA	NA
1.2.99.6	carboxylate_reductase;	0	NA	NA	NA
1.21.3.1	isopenicillin-N_synthase;	0	NA	NA	NA
1.21.3.2	columbamine_oxidase;	0	NA	NA	NA
1.21.3.3	reticuline_oxidase;	0	NA	NA	NA
1.21.3.6	aureusidin_synthase	0	NA	NA	NA
1.21.4.1	D-proline_reductase_(dithiol)	0	NA	NA	NA
1.3.-.-	no_name	0	NA	NA	NA
1.3.1.11	2-coumarate_reductase;	0	NA	NA	NA
1.3.1.13	prephenate_dehydrogenase_(NADP+);	0	NA	NA	NA
1.3.1.14	orotate_reductase_(NADH);	0	NA	NA	NA
1.3.1.18	kynurenate-7,8-dihydrodiol_dehydrogenase;	0	NA	NA	NA
1.3.1.19	cis-1,2-dihydrobenzene-1,2-diol_dehydrogenase;	0	NA	NA	NA
1.3.1.20	trans-1,2-dihydrobenzene-1,2-diol_dehydrogenase;	0	NA	NA	NA
1.3.1.21	7-dehydrocholesterol_reductase	0	NA	NA	NA
1.3.1.24	biliverdin_reductase	0	NA	NA	NA
1.3.1.28	2,3-dihydro-2,3-dihydroxybenzoate_dehydrogenase;	0	NA	NA	NA
1.3.1.29	cis-1,2-dihydro-1,2-dihydroxynaphthalene_dehydrogenase;	0	NA	NA	NA
1.3.1.3	Delta4-3-oxosteroid_5beta-reductase;	0	NA	NA	NA
1.3.1.30	progesterone_5alpha-reductase;	0	NA	NA	NA
1.3.1.31	2-enoate_reductase;	0	NA	NA	NA
1.3.1.33	protochlorophyllide_reductase;	0	NA	NA	NA
1.3.1.36	geissoschizine_dehydrogenase	0	NA	NA	NA
1.3.1.42	12-oxophytodienoate_reductase;	0	NA	NA	NA
1.3.1.45	2-hydroxyisoflavone_reductase;	0	NA	NA	NA
1.3.1.46	biochanin-A_reductase	0	NA	NA	NA
1.3.1.49	cis-3,4-dihydrophenanthrene-3,4-diol_dehydrogenase	0	NA	NA	NA
1.3.1.51	2-hydroxydaidzein_reductase;	0	NA	NA	NA
1.3.1.52	2-methyl-branched-chain-enoyl-CoA_reductase	0	NA	NA	NA
1.3.1.53	(3S,4R)-3,4-dihydroxycyclohexa-1,5-diene-1,4-dicarboxylate	0	NA	NA	NA
1.3.1.54	precorrin-6A_reductase;	0	NA	NA	NA
1.3.1.57	phloroglucinol_reductase	0	NA	NA	NA
1.3.1.62	pimeloyl-CoA_dehydrogenase	0	NA	NA	NA
1.3.1.63	2,4-dichlorobenzoyl-CoA_reductase	0	NA	NA	NA
1.3.1.64	phthalate_4,5-cis-dihydrodiol_dehydrogenase	0	NA	NA	NA
1.3.1.66	cis-dihydroethylcatechol_dehydrogenase	0	NA	NA	NA
1.3.1.67	cis-1,2-dihydroxy-4-methylcyclohexa-3,5-diene-1-carboxylate	0	NA	NA	NA
1.3.1.68	1,2-dihydroxy-6-methylcyclohexa-3,5-dienecarboxylate_dehydrogenase	0	NA	NA	NA
1.3.1.7	meso-tartrate_dehydrogenase	0	NA	NA	NA
1.3.1.70	Delta14-sterol_reductase	0	NA	NA	NA
1.3.1.71	Delta24(241)-sterol_reductase;	0	NA	NA	NA
1.3.1.72	Delta24-sterol_reductase;	0	NA	NA	NA
1.3.1.73	1,2-dihydrovomilenine_reductase	0	NA	NA	NA
1.3.1.75	divinyl_chlorophyllide_a_8-vinyl-reductase;	0	NA	NA	NA
1.3.1.77	anthocyanidin_reductase;	0	NA	NA	NA
1.3.2.3	L-galactonolactone_dehydrogenase;	0	NA	NA	NA
1.3.3.-	no_name	0	NA	NA	NA
1.3.3.12	L-galactonolactone_oxidase;	0	NA	NA	NA
1.3.3.5	bilirubin_oxidase;	0	NA	NA	NA
1.3.3.8	tetrahydroberberine_oxidase;	0	NA	NA	NA
1.3.3.9	secologanin_synthase	0	NA	NA	NA
1.3.7.1	6-hydroxynicotinate_reductase;	0	NA	NA	NA
1.3.7.2	15,16-dihydrobiliverdin:ferredoxin_oxidoreductase;	0	NA	NA	NA
1.3.7.3	phycoerythrobilin:ferredoxin_oxidoreductase;	0	NA	NA	NA
1.3.7.4	phytochromobilin:ferredoxin_oxidoreductase;	0	NA	NA	NA
1.3.7.5	phycocyanobilin:ferredoxin_oxidoreductase	0	NA	NA	NA
1.3.99.10	isovaleryl-CoA_dehydrogenase;	0	NA	NA	NA
1.3.99.12	2-methylacyl-CoA_dehydrogenase;	0	NA	NA	NA
1.3.99.15	benzoyl-CoA_reductase;	0	NA	NA	NA
1.3.99.5	3-oxo-5alpha-steroid_4-dehydrogenase;	0	NA	NA	NA
1.3.99.6	3-oxo-5beta-steroid_4-dehydrogenase;	0	NA	NA	NA
1.4.1.-	no_name	0	NA	NA	NA
1.4.1.11	L-erythro-3,5-diaminohexanoate_dehydrogenase;	0	NA	NA	NA
1.4.1.12	2,4-diaminopentanoate_dehydrogenase;	0	NA	NA	NA
1.4.1.21	aspartate_dehydrogenase;	0	NA	NA	NA
1.4.2.1	glycine_dehydrogenase_(cytochrome);	0	NA	NA	NA
1.4.3.1	D-aspartate_oxidase;	0	NA	NA	NA
1.4.3.12	cyclohexylamine_oxidase	0	NA	NA	NA
1.4.3.14	L-lysine_oxidase;	0	NA	NA	NA
1.4.3.15	D-glutamate(D-aspartate)_oxidase;	0	NA	NA	NA
1.4.3.19	glycine_oxidase	0	NA	NA	NA
1.4.3.5	pyridoxal_5-phosphate_synthase;	0	NA	NA	NA
1.4.3.7	D-glutamate_oxidase;	0	NA	NA	NA
1.4.99.4	aralkylamine_dehydrogenase;	0	NA	NA	NA
1.5.1.1	pyrroline-2-carboxylate_reductase;	0	NA	NA	NA
1.5.1.16	D-lysopine_dehydrogenase;	0	NA	NA	NA
1.5.1.21	Delta1-piperideine-2-carboxylate_reductase;	0	NA	NA	NA
1.5.1.27	1,2-dehydroreticulinium_reductase_(NADPH);	0	NA	NA	NA
1.5.1.32	vomilenine_reductase	0	NA	NA	NA
1.5.1.34	6,7-dihydropteridine_reductase;	0	NA	NA	NA
1.5.1.6	formyltetrahydrofolate_dehydrogenase;	0	NA	NA	NA
1.5.3.12	dihydrobenzophenanthridine_oxidase	0	NA	NA	NA
1.5.3.5	(S)-6-hydroxynicotine_oxidase;	0	NA	NA	NA
1.5.3.6	(R)-6-hydroxynicotine_oxidase;	0	NA	NA	NA
1.5.3.7	L-pipecolate_oxidase;	0	NA	NA	NA
1.5.4.1	pyrimidodiazepine_synthase;	0	NA	NA	NA
1.5.7.1	methylenetetrahydrofolate_reductase_(ferredoxin);	0	NA	NA	NA
1.5.8.1	dimethylamine_dehydrogenase	0	NA	NA	NA
1.5.99.11	5,10-methylenetetrahydromethanopterin_reductase;	0	NA	NA	NA
1.5.99.3	L-pipecolate_dehydrogenase;	0	NA	NA	NA
1.5.99.4	nicotine_dehydrogenase;	0	NA	NA	NA
1.5.99.5	methylglutamate_dehydrogenase;	0	NA	NA	NA
1.5.99.6	spermidine_dehydrogenase;	0	NA	NA	NA
1.5.99.9	methylenetetrahydromethanopterin_dehydrogenase;	0	NA	NA	NA
1.6.2.2	cytochrome-b5_reductase;	0	NA	NA	NA
1.6.5.2	NAD(P)H_dehydrogenase_(quinone);	0	NA	NA	NA
1.6.5.4	monodehydroascorbate_reductase_(NADH);	0	NA	NA	NA
1.6.5.6	p-benzoquinone_reductase_(NADPH)	0	NA	NA	NA
1.6.5.7	2-hydroxy-1,4-benzoquinone_reductase;	0	NA	NA	NA
1.6.6.9	trimethylamine-N-oxide_reductase;	0	NA	NA	NA
1.7.1.10	hydroxylamine_reductase_(NADH);	0	NA	NA	NA
1.7.1.2	nitrate_reductase_[NAD(P)H];	0	NA	NA	NA
1.7.1.3	nitrate_reductase_(NADPH);	0	NA	NA	NA
1.7.1.4	nitrite_reductase_[NAD(P)H];	0	NA	NA	NA
1.7.3.1	nitroalkane_oxidase;	0	NA	NA	NA
1.7.3.2	acetylindoxyl_oxidase	0	NA	NA	NA
1.7.3.3	urate_oxidase;	0	NA	NA	NA
1.8.1.10	CoA-glutathione_reductase;	0	NA	NA	NA
1.8.1.13	bis-gamma-glutamylcystine_reductase;	0	NA	NA	NA
1.8.3.3	glutathione_oxidase	0	NA	NA	NA
1.8.4.1	glutathione---homocystine_transhydrogenase	0	NA	NA	NA
1.8.4.13	L-methionine_(S)-S-oxide_reductase;	0	NA	NA	NA
1.8.4.14	L-methionine_(R)-S-oxide_reductase;	0	NA	NA	NA
1.8.4.3	glutathione---CoA-glutathione_transhydrogenase;	0	NA	NA	NA
1.8.4.4	glutathione---cystine_transhydrogenase;	0	NA	NA	NA
1.8.5.1	glutathione_dehydrogenase_(ascorbate);	0	NA	NA	NA
1.8.98.1	CoB---CoM_heterodisulfide_reductase;	0	NA	NA	NA
1.8.99.1	sulfite_reductase;	0	NA	NA	NA
1.8.99.2	adenylyl-sulfate_reductase;	0	NA	NA	NA
1.8.99.3	hydrogensulfite_reductase;	0	NA	NA	NA
1.97.1.-	no_name	0	NA	NA	NA
1.97.1.2	pyrogallol_hydroxytransferase;	0	NA	NA	NA
1.97.1.8	tetrachloroethene_reductive_dehalogenase;	0	NA	NA	NA
2.-.-.-	no_name	0	NA	NA	NA
2.1.1.1	nicotinamide_N-methyltransferase;	0	NA	NA	NA
2.1.1.102	demethylmacrocin_O-methyltransferase;	0	NA	NA	NA
2.1.1.104	caffeoyl-CoA_O-methyltransferase;	0	NA	NA	NA
2.1.1.11	magnesium_protoporphyrin_IX_methyltransferase	0	NA	NA	NA
2.1.1.111	anthranilate_N-methyltransferase;	0	NA	NA	NA
2.1.1.115	(RS)-1-benzyl-1,2,3,4-tetrahydroisoquinoline_N-methyltransferase;	0	NA	NA	NA
2.1.1.116	3-hydroxy-N-methyl-(S)-coclaurine_4-O-methyltransferase	0	NA	NA	NA
2.1.1.117	(S)-scoulerine_9-O-methyltransferase	0	NA	NA	NA
2.1.1.118	columbamine_O-methyltransferase	0	NA	NA	NA
2.1.1.119	10-hydroxydihydrosanguinarine_10-O-methyltransferase	0	NA	NA	NA
2.1.1.12	methionine_S-methyltransferase;	0	NA	NA	NA
2.1.1.120	12-hydroxydihydrochelirubine_12-O-methyltransferase	0	NA	NA	NA
2.1.1.121	6-O-methylnorlaudanosoline_5-O-methyltransferase	0	NA	NA	NA
2.1.1.122	(S)-tetrahydroprotoberberine_N-methyltransferase;	0	NA	NA	NA
2.1.1.128	(RS)-norcoclaurine_6-O-methyltransferase	0	NA	NA	NA
2.1.1.130	precorrin-2_C20-methyltransferase	0	NA	NA	NA
2.1.1.131	precorrin-3B_C17-methyltransferase;	0	NA	NA	NA
2.1.1.132	precorrin-6Y_C5,15-methyltransferase_(decarboxylating);	0	NA	NA	NA
2.1.1.133	precorrin-4_C11-methyltransferase;	0	NA	NA	NA
2.1.1.140	(S)-coclaurine-N-methyltransferase	0	NA	NA	NA
2.1.1.141	jasmonate_O-methyltransferase;	0	NA	NA	NA
2.1.1.143	24-methylenesterol_C-methyltransferase;	0	NA	NA	NA
2.1.1.150	isoflavone_7-O-methyltransferase	0	NA	NA	NA
2.1.1.151	cobalt-factor_II_C20-methyltransferase;	0	NA	NA	NA
2.1.1.152	precorrin-6A_synthase_(deacetylating);	0	NA	NA	NA
2.1.1.158	7-methylxanthosine_synthase;	0	NA	NA	NA
2.1.1.159	theobromine_synthase;	0	NA	NA	NA
2.1.1.160	caffeine_synthase;	0	NA	NA	NA
2.1.1.19	trimethylsulfonium---tetrahydrofolate_N-methyltransferase;	0	NA	NA	NA
2.1.1.2	guanidinoacetate_N-methyltransferase;	0	NA	NA	NA
2.1.1.20	glycine_N-methyltransferase;	0	NA	NA	NA
2.1.1.21	methylamine---glutamate_N-methyltransferase;	0	NA	NA	NA
2.1.1.22	carnosine_N-methyltransferase	0	NA	NA	NA
2.1.1.25	phenol_O-methyltransferase;	0	NA	NA	NA
2.1.1.27	tyramine_N-methyltransferase;	0	NA	NA	NA
2.1.1.28	phenylethanolamine_N-methyltransferase;	0	NA	NA	NA
2.1.1.38	O-demethylpuromycin_O-methyltransferase;	0	NA	NA	NA
2.1.1.39	inositol_3-methyltransferase;	0	NA	NA	NA
2.1.1.4	acetylserotonin_O-methyltransferase;	0	NA	NA	NA
2.1.1.40	inositol_1-methyltransferase;	0	NA	NA	NA
2.1.1.41	sterol_24-C-methyltransferase;	0	NA	NA	NA
2.1.1.43	histone-lysine_N-methyltransferase;	0	NA	NA	NA
2.1.1.46	isoflavone_4-O-methyltransferase;	0	NA	NA	NA
2.1.1.47	indolepyruvate_C-methyltransferase;	0	NA	NA	NA
2.1.1.49	amine_N-methyltransferase;	0	NA	NA	NA
2.1.1.50	loganate_O-methyltransferase;	0	NA	NA	NA
2.1.1.53	putrescine_N-methyltransferase;	0	NA	NA	NA
2.1.1.59	[cytochrome_c]-lysine_N-methyltransferase;	0	NA	NA	NA
2.1.1.6	catechol_O-methyltransferase;	0	NA	NA	NA
2.1.1.60	calmodulin-lysine_N-methyltransferase;	0	NA	NA	NA
2.1.1.68	caffeate_O-methyltransferase;	0	NA	NA	NA
2.1.1.7	nicotinate_N-methyltransferase;	0	NA	NA	NA
2.1.1.75	apigenin_4-O-methyltransferase;	0	NA	NA	NA
2.1.1.76	quercetin_3-O-methyltransferase;	0	NA	NA	NA
2.1.1.8	histamine_N-methyltransferase;	0	NA	NA	NA
2.1.1.86	tetrahydromethanopterin_S-methyltransferase;	0	NA	NA	NA
2.1.1.89	tetrahydrocolumbamine_2-O-methyltransferase;	0	NA	NA	NA
2.1.1.9	thiol_S-methyltransferase;	0	NA	NA	NA
2.1.1.94	tabersonine_16-O-methyltransferase;	0	NA	NA	NA
2.1.1.95	tocopherol_O-methyltransferase;	0	NA	NA	NA
2.1.1.99	3-hydroxy-16-methoxy-2,3-dihydrotabersonine_N-methyltransferase;	0	NA	NA	NA
2.1.2.-	no_name	0	NA	NA	NA
2.1.2.4	glycine_formimidoyltransferase;	0	NA	NA	NA
2.1.2.7	D-alanine_2-hydroxymethyltransferase;	0	NA	NA	NA
2.1.2.8	deoxycytidylate_5-hydroxymethyltransferase;	0	NA	NA	NA
2.1.3.-	no_name	0	NA	NA	NA
2.1.3.5	oxamate_carbamoyltransferase;	0	NA	NA	NA
2.1.4.1	glycine_amidinotransferase;	0	NA	NA	NA
2.1.4.2	scyllo-inosamine-4-phosphate_amidinotransferase;	0	NA	NA	NA
2.2.1.3	formaldehyde_transketolase;	0	NA	NA	NA
2.2.1.5	2-hydroxy-3-oxoadipate_synthase;	0	NA	NA	NA
2.2.1.7	1-deoxy-D-xylulose-5-phosphate_synthase;	0	NA	NA	NA
2.3.-.-	no_name	0	NA	NA	NA
2.3.1.101	formylmethanofuran-tetrahydromethanopterin_N-formyltransferase;	0	NA	NA	NA
2.3.1.102	N6-hydroxylysine_O-acetyltransferase;	0	NA	NA	NA
2.3.1.104	1-alkenylglycerophosphocholine_O-acyltransferase	0	NA	NA	NA
2.3.1.105	alkylglycerophosphate_2-O-acetyltransferase;	0	NA	NA	NA
2.3.1.107	deacetylvindoline_O-acetyltransferase;	0	NA	NA	NA
2.3.1.115	isoflavone-7-O-beta-glucoside_6-O-malonyltransferase;	0	NA	NA	NA
2.3.1.121	1-alkenylglycerophosphoethanolamine_O-acyltransferase	0	NA	NA	NA
2.3.1.125	1-alkyl-2-acetylglycerol_O-acyltransferase;	0	NA	NA	NA
2.3.1.129	acyl-[acyl-carrier-protein]---UDP-N-acetylglucosamine	0	NA	NA	NA
2.3.1.133	shikimate_O-hydroxycinnamoyltransferase;	0	NA	NA	NA
2.3.1.134	galactolipid_O-acyltransferase;	0	NA	NA	NA
2.3.1.14	glutamine_N-phenylacetyltransferase;	0	NA	NA	NA
2.3.1.140	rosmarinate_synthase;	0	NA	NA	NA
2.3.1.141	galactosylacylglycerol_O-acyltransferase;	0	NA	NA	NA
2.3.1.146	pinosylvin_synthase;	0	NA	NA	NA
2.3.1.150	salutaridinol_7-O-acetyltransferase	0	NA	NA	NA
2.3.1.153	anthocyanin_5-aromatic_acyltransferase	0	NA	NA	NA
2.3.1.158	phospholipid:diacylglycerol_acyltransferase;	0	NA	NA	NA
2.3.1.159	acridone_synthase	0	NA	NA	NA
2.3.1.160	vinorine_synthase	0	NA	NA	NA
2.3.1.162	taxadien-5alpha-ol_O-acetyltransferase;	0	NA	NA	NA
2.3.1.164	isopenicillin-N_N-acyltransferase;	0	NA	NA	NA
2.3.1.166	2alpha-hydroxytaxane_2-O-benzoyltransferase;	0	NA	NA	NA
2.3.1.167	10-deacetylbaccatin_III_10-O-acetyltransferase	0	NA	NA	NA
2.3.1.171	anthocyanin_6-O-malonyltransferase	0	NA	NA	NA
2.3.1.172	anthocyanin_5-O-glucoside_6-O-malonyltransferase	0	NA	NA	NA
2.3.1.175	deacetylcephalosporin-C_acetyltransferase;	0	NA	NA	NA
2.3.1.178	diaminobutyrate_acetyltransferase;	0	NA	NA	NA
2.3.1.181	lipoyl(octanoyl)_transferase;	0	NA	NA	NA
2.3.1.21	carnitine_O-palmitoyltransferase;	0	NA	NA	NA
2.3.1.22	2-acylglycerol_O-acyltransferase;	0	NA	NA	NA
2.3.1.23	1-acylglycerophosphocholine_O-acyltransferase;	0	NA	NA	NA
2.3.1.24	sphingosine_N-acyltransferase;	0	NA	NA	NA
2.3.1.25	plasmalogen_synthase;	0	NA	NA	NA
2.3.1.26	sterol_O-acyltransferase;	0	NA	NA	NA
2.3.1.3	glucosamine_N-acetyltransferase;	0	NA	NA	NA
2.3.1.32	lysine_N-acetyltransferase;	0	NA	NA	NA
2.3.1.36	D-amino-acid_N-acetyltransferase;	0	NA	NA	NA
2.3.1.38	[acyl-carrier-protein]_S-acetyltransferase;	0	NA	NA	NA
2.3.1.42	glycerone-phosphate_O-acyltransferase;	0	NA	NA	NA
2.3.1.5	arylamine_N-acetyltransferase;	0	NA	NA	NA
2.3.1.50	serine_C-palmitoyltransferase;	0	NA	NA	NA
2.3.1.52	2-acylglycerol-3-phosphate_O-acyltransferase;	0	NA	NA	NA
2.3.1.53	phenylalanine_N-acetyltransferase;	0	NA	NA	NA
2.3.1.57	diamine_N-acetyltransferase;	0	NA	NA	NA
2.3.1.6	choline_O-acetyltransferase;	0	NA	NA	NA
2.3.1.62	2-acylglycerophosphocholine_O-acyltransferase;	0	NA	NA	NA
2.3.1.63	1-alkylglycerophosphocholine_O-acyltransferase	0	NA	NA	NA
2.3.1.65	bile_acid-CoA:amino_acid_N-acyltransferase;	0	NA	NA	NA
2.3.1.67	1-alkylglycerophosphocholine_O-acetyltransferase;	0	NA	NA	NA
2.3.1.70	CDP-acylglycerol_O-arachidonoyltransferase;	0	NA	NA	NA
2.3.1.71	glycine_N-benzoyltransferase;	0	NA	NA	NA
2.3.1.73	diacylglycerol---sterol_O-acyltransferase;	0	NA	NA	NA
2.3.1.74	naringenin-chalcone_synthase;	0	NA	NA	NA
2.3.1.76	retinol_O-fatty-acyltransferase;	0	NA	NA	NA
2.3.1.78	heparan-alpha-glucosaminide_N-acetyltransferase;	0	NA	NA	NA
2.3.1.80	cysteine-S-conjugate_N-acetyltransferase	0	NA	NA	NA
2.3.1.87	aralkylamine_N-acetyltransferase;	0	NA	NA	NA
2.3.1.91	sinapoylglucose---choline_O-sinapoyltransferase;	0	NA	NA	NA
2.3.1.92	sinapoylglucose---malate_O-sinapoyltransferase;	0	NA	NA	NA
2.3.1.94	erythronolide_synthase;	0	NA	NA	NA
2.3.1.95	trihydroxystilbene_synthase;	0	NA	NA	NA
2.3.1.96	glycoprotein_N-palmitoyltransferase;	0	NA	NA	NA
2.3.1.99	quinate_O-hydroxycinnamoyltransferase;	0	NA	NA	NA
2.3.2.-	no_name	0	NA	NA	NA
2.3.2.1	D-glutamyltransferase;	0	NA	NA	NA
2.3.2.10	UDP-N-acetylmuramoylpentapeptide-lysine_N6-alanyltransferase;	0	NA	NA	NA
2.3.2.4	gamma-glutamylcyclotransferase;	0	NA	NA	NA
2.3.3.11	2-hydroxyglutarate_synthase;	0	NA	NA	NA
2.3.3.12	3-propylmalate_synthase;	0	NA	NA	NA
2.3.3.13	2-isopropylmalate_synthase;	0	NA	NA	NA
2.3.3.14	homocitrate_synthase;	0	NA	NA	NA
2.3.3.6	2-ethylmalate_synthase;	0	NA	NA	NA
2.3.3.7	3-ethylmalate_synthase;	0	NA	NA	NA
2.4.1.101	alpha-1,3-mannosyl-glycoprotein	0	NA	NA	NA
2.4.1.102	beta-1,3-galactosyl-O-glycosyl-glycoprotein	0	NA	NA	NA
2.4.1.111	coniferyl-alcohol_glucosyltransferase;	0	NA	NA	NA
2.4.1.114	2-coumarate_O-beta-glucosyltransferase;	0	NA	NA	NA
2.4.1.115	anthocyanidin_3-O-glucosyltransferase;	0	NA	NA	NA
2.4.1.116	cyanidin_3-O-rutinoside_5-O-glucosyltransferase;	0	NA	NA	NA
2.4.1.117	dolichyl-phosphate_beta-glucosyltransferase;	0	NA	NA	NA
2.4.1.119	dolichyl-diphosphooligosaccharide---protein_glycotransferase;	0	NA	NA	NA
2.4.1.120	sinapate_1-glucosyltransferase;	0	NA	NA	NA
2.4.1.122	glycoprotein-N-acetylgalactosamine_3-beta-galactosyltransferase;	0	NA	NA	NA
2.4.1.123	inositol_3-alpha-galactosyltransferase;	0	NA	NA	NA
2.4.1.128	scopoletin_glucosyltransferase;	0	NA	NA	NA
2.4.1.129	peptidoglycan_glycosyltransferase;	0	NA	NA	NA
2.4.1.130	dolichyl-phosphate-mannose---glycolipid_alpha-mannosyltransferase;	0	NA	NA	NA
2.4.1.132	glycolipid_3-alpha-mannosyltransferase;	0	NA	NA	NA
2.4.1.133	xylosylprotein_4-beta-galactosyltransferase;	0	NA	NA	NA
2.4.1.134	galactosylxylosylprotein_3-beta-galactosyltransferase;	0	NA	NA	NA
2.4.1.135	galactosylgalactosylxylosylprotein_3-beta-glucuronosyltransferase;	0	NA	NA	NA
2.4.1.141	N-acetylglucosaminyldiphosphodolichol	0	NA	NA	NA
2.4.1.142	chitobiosyldiphosphodolichol_beta-mannosyltransferase;	0	NA	NA	NA
2.4.1.143	alpha-1,6-mannosyl-glycoprotein	0	NA	NA	NA
2.4.1.144	beta-1,4-mannosyl-glycoprotein	0	NA	NA	NA
2.4.1.145	alpha-1,3-mannosyl-glycoprotein	0	NA	NA	NA
2.4.1.147	acetylgalactosaminyl-O-glycosyl-glycoprotein	0	NA	NA	NA
2.4.1.148	acetylgalactosaminyl-O-glycosyl-glycoprotein	0	NA	NA	NA
2.4.1.149	N-acetyllactosaminide_beta-1,3-N-acetylglucosaminyltransferase;	0	NA	NA	NA
2.4.1.150	N-acetyllactosaminide_beta-1,6-N-acetylglucosaminyl-transferase;	0	NA	NA	NA
2.4.1.152	4-galactosyl-N-acetylglucosaminide_3-alpha-L-fucosyltransferase;	0	NA	NA	NA
2.4.1.155	alpha-1,6-mannosyl-glycoprotein	0	NA	NA	NA
2.4.1.159	flavonol-3-O-glucoside_L-rhamnosyltransferase;	0	NA	NA	NA
2.4.1.16	chitin_synthase;	0	NA	NA	NA
2.4.1.163	beta-galactosyl-N-acetylglucosaminylgalactosylglucosyl-ceramide	0	NA	NA	NA
2.4.1.170	isoflavone_7-O-glucosyltransferase;	0	NA	NA	NA
2.4.1.174	glucuronylgalactosylproteoglycan	0	NA	NA	NA
2.4.1.175	glucuronosyl-N-acetylgalactosaminyl-proteoglycan	0	NA	NA	NA
2.4.1.178	hydroxymandelonitrile_glucosyltransferase;	0	NA	NA	NA
2.4.1.182	lipid-A-disaccharide_synthase	0	NA	NA	NA
2.4.1.184	galactolipid_galactosyltransferase;	0	NA	NA	NA
2.4.1.185	flavanone_7-O-beta-glucosyltransferase;	0	NA	NA	NA
2.4.1.198	phosphatidylinositol_N-acetylglucosaminyltransferase;	0	NA	NA	NA
2.4.1.201	alpha-1,6-mannosyl-glycoprotein	0	NA	NA	NA
2.4.1.202	2,4-dihydroxy-7-methoxy-2H-1,4-benzoxazin-3(4H)-one	0	NA	NA	NA
2.4.1.206	lactosylceramide_1,3-N-acetyl-beta-D-glucosaminyltransferase;	0	NA	NA	NA
2.4.1.219	vomilenine_glucosyltransferase;	0	NA	NA	NA
2.4.1.22	lactose_synthase;	0	NA	NA	NA
2.4.1.223	glucuronyl-galactosyl-proteoglycan	0	NA	NA	NA
2.4.1.224	glucuronosyl-N-acetylglucosaminyl-proteoglycan	0	NA	NA	NA
2.4.1.225	N-acetylglucosaminyl-proteoglycan_4-beta-glucuronosyltransferase;	0	NA	NA	NA
2.4.1.226	N-acetylgalactosaminyl-proteoglycan_3-beta-glucuronosyltransferase;	0	NA	NA	NA
2.4.1.228	lactosylceramide_4-alpha-galactosyltransferase;	0	NA	NA	NA
2.4.1.23	sphingosine_beta-galactosyltransferase;	0	NA	NA	NA
2.4.1.236	flavanone_7-O-glucoside_2-O-beta-L-rhamnosyltransferase;	0	NA	NA	NA
2.4.1.238	anthocyanin_3-O-beta-glucosyltransferase;	0	NA	NA	NA
2.4.1.241	digalactosyldiacylglycerol_synthase;	0	NA	NA	NA
2.4.1.29	cellulose_synthase_(GDP-forming);	0	NA	NA	NA
2.4.1.33	alginate_synthase;	0	NA	NA	NA
2.4.1.34	1,3-beta-glucan_synthase;	0	NA	NA	NA
2.4.1.35	phenol_beta-glucosyltransferase;	0	NA	NA	NA
2.4.1.37	fucosylgalactoside_3-alpha-galactosyltransferase;	0	NA	NA	NA
2.4.1.38	beta-N-acetylglucosaminylglycopeptide	0	NA	NA	NA
2.4.1.40	glycoprotein-fucosylgalactoside	0	NA	NA	NA
2.4.1.41	polypeptide_N-acetylgalactosaminyltransferase;	0	NA	NA	NA
2.4.1.43	polygalacturonate_4-alpha-galacturonosyltransferase;	0	NA	NA	NA
2.4.1.44	lipopolysaccharide_3-alpha-galactosyltransferase;	0	NA	NA	NA
2.4.1.46	monogalactosyldiacylglycerol_synthase;	0	NA	NA	NA
2.4.1.47	N-acylsphingosine_galactosyltransferase;	0	NA	NA	NA
2.4.1.50	procollagen_galactosyltransferase;	0	NA	NA	NA
2.4.1.56	lipopolysaccharide_N-acetylglucosaminyltransferase;	0	NA	NA	NA
2.4.1.58	lipopolysaccharide_glucosyltransferase_I;	0	NA	NA	NA
2.4.1.62	ganglioside_galactosyltransferase;	0	NA	NA	NA
2.4.1.65	3-galactosyl-N-acetylglucosaminide_4-alpha-L-fucosyltransferase;	0	NA	NA	NA
2.4.1.67	galactinol---raffinose_galactosyltransferase;	0	NA	NA	NA
2.4.1.68	glycoprotein_6-alpha-L-fucosyltransferase;	0	NA	NA	NA
2.4.1.69	galactoside_2-alpha-L-fucosyltransferase;	0	NA	NA	NA
2.4.1.79	globotriaosylceramide_3-beta-N-acetylgalactosaminyltransferase;	0	NA	NA	NA
2.4.1.80	ceramide_glucosyltransferase;	0	NA	NA	NA
2.4.1.81	flavone_7-O-beta-glucosyltransferase;	0	NA	NA	NA
2.4.1.82	galactinol---sucrose_galactosyltransferase;	0	NA	NA	NA
2.4.1.83	dolichyl-phosphate_beta-D-mannosyltransferase;	0	NA	NA	NA
2.4.1.85	cyanohydrin_beta-glucosyltransferase;	0	NA	NA	NA
2.4.1.87	N-acetyllactosaminide_3-alpha-galactosyltransferase;	0	NA	NA	NA
2.4.1.88	globoside_alpha-N-acetylgalactosaminyltransferase;	0	NA	NA	NA
2.4.1.91	flavonol_3-O-glucosyltransferase;	0	NA	NA	NA
2.4.1.92	(N-acetylneuraminyl)-galactosylglucosylceramide	0	NA	NA	NA
2.4.2.11	nicotinate_phosphoribosyltransferase;	0	NA	NA	NA
2.4.2.15	guanosine_phosphorylase	0	NA	NA	NA
2.4.2.16	urate-ribonucleotide_phosphorylase;	0	NA	NA	NA
2.4.2.19	nicotinate-nucleotide_diphosphorylase_(carboxylating);	0	NA	NA	NA
2.4.2.21	nicotinate-nucleotide---dimethylbenzimidazole	0	NA	NA	NA
2.4.2.23	deoxyuridine_phosphorylase	0	NA	NA	NA
2.4.2.24	1,4-beta-D-xylan_synthase;	0	NA	NA	NA
2.4.2.25	flavone_apiosyltransferase;	0	NA	NA	NA
2.4.2.26	protein_xylosyltransferase;	0	NA	NA	NA
2.4.2.27	dTDP-dihydrostreptose---streptidine-6-phosphate	0	NA	NA	NA
2.4.2.28	S-methyl-5-thioadenosine_phosphorylase;	0	NA	NA	NA
2.4.99.-	no_name	0	NA	NA	NA
2.4.99.1	beta-galactoside_alpha-2,6-sialyltransferase	0	NA	NA	NA
2.4.99.10	neolactotetraosylceramide_alpha-2,3-sialyltransferase;	0	NA	NA	NA
2.4.99.3	alpha-N-acetylgalactosaminide_alpha-2,6-sialyltransferase	0	NA	NA	NA
2.4.99.4	beta-galactoside_alpha-2,3-sialyltransferase	0	NA	NA	NA
2.4.99.5	galactosyldiacylglycerol_alpha-2,3-sialyltransferase	0	NA	NA	NA
2.4.99.6	N-acetyllactosaminide_alpha-2,3-sialyltransferase;	0	NA	NA	NA
2.4.99.8	alpha-N-acetylneuraminate_alpha-2,8-sialyltransferase;	0	NA	NA	NA
2.4.99.9	lactosylceramide_alpha-2,3-sialyltransferase;	0	NA	NA	NA
2.5.1.1	dimethylallyltranstransferase;	0	NA	NA	NA
2.5.1.10	geranyltranstransferase;	0	NA	NA	NA
2.5.1.11	trans-octaprenyltranstransferase;	0	NA	NA	NA
2.5.1.17	cob(I)yrinic_acid_a,c-diamide_adenosyltransferase;	0	NA	NA	NA
2.5.1.20	rubber_cis-polyprenylcistransferase;	0	NA	NA	NA
2.5.1.21	squalene_synthase;	0	NA	NA	NA
2.5.1.22	spermine_synthase;	0	NA	NA	NA
2.5.1.23	sym-norspermidine_synthase	0	NA	NA	NA
2.5.1.26	alkylglycerone-phosphate_synthase;	0	NA	NA	NA
2.5.1.29	farnesyltranstransferase;	0	NA	NA	NA
2.5.1.30	trans-hexaprenyltranstransferase;	0	NA	NA	NA
2.5.1.31	di-trans,poly-cis-decaprenylcistransferase;	0	NA	NA	NA
2.5.1.32	phytoene_synthase;	0	NA	NA	NA
2.5.1.33	trans-pentaprenyltranstransferase;	0	NA	NA	NA
2.5.1.36	trihydroxypterocarpan_dimethylallyltransferase;	0	NA	NA	NA
2.5.1.39	4-hydroxybenzoate_nonaprenyltransferase;	0	NA	NA	NA
2.5.1.44	homospermidine_synthase	0	NA	NA	NA
2.5.1.55	3-deoxy-8-phosphooctulonate_synthase;	0	NA	NA	NA
2.5.1.62	chlorophyll_synthase	0	NA	NA	NA
2.5.1.64	2-succinyl-6-hydroxy-2,4-cyclohexadiene-1-carboxylate_synthase;	0	NA	NA	NA
2.5.1.65	O-phosphoserine_sulfhydrylase;	0	NA	NA	NA
2.5.1.66	N2-(2-carboxyethyl)arginine_synthase;	0	NA	NA	NA
2.6.-.-	no_name	0	NA	NA	NA
2.6.1.12	alanine---oxo-acid_transaminase;	0	NA	NA	NA
2.6.1.14	asparagine---oxo-acid_transaminase;	0	NA	NA	NA
2.6.1.15	glutamine---pyruvate_transaminase;	0	NA	NA	NA
2.6.1.23	4-hydroxyglutamate_transaminase;	0	NA	NA	NA
2.6.1.27	tryptophan_transaminase;	0	NA	NA	NA
2.6.1.29	diamine_transaminase;	0	NA	NA	NA
2.6.1.30	pyridoxamine---pyruvate_transaminase;	0	NA	NA	NA
2.6.1.31	pyridoxamine---oxaloacetate_transaminase	0	NA	NA	NA
2.6.1.33	dTDP-4-amino-4,6-dideoxy-D-glucose_transaminase;	0	NA	NA	NA
2.6.1.38	histidine_transaminase;	0	NA	NA	NA
2.6.1.4	glycine_transaminase;	0	NA	NA	NA
2.6.1.41	D-methionine---pyruvate_transaminase;	0	NA	NA	NA
2.6.1.43	aminolevulinate_transaminase;	0	NA	NA	NA
2.6.1.48	5-aminovalerate_transaminase;	0	NA	NA	NA
2.6.1.49	dihydroxyphenylalanine_transaminase;	0	NA	NA	NA
2.6.1.54	pyridoxamine-phosphate_transaminase;	0	NA	NA	NA
2.6.1.55	taurine---2-oxoglutarate_transaminase;	0	NA	NA	NA
2.6.1.6	leucine_transaminase;	0	NA	NA	NA
2.6.1.65	N6-acetyl-beta-lysine_transaminase;	0	NA	NA	NA
2.6.1.7	kynurenine---oxoglutarate_transaminase;	0	NA	NA	NA
2.6.1.74	cephalosporin-C_transaminase;	0	NA	NA	NA
2.6.1.76	diaminobutyrate---2-oxoglutarate_transaminase;	0	NA	NA	NA
2.6.99.2	pyridoxine_5-phosphate_synthase;	0	NA	NA	NA
2.7.-.-	no_name	0	NA	NA	NA
2.7.1.10	phosphoglucokinase;	0	NA	NA	NA
2.7.1.101	tagatose_kinase;	0	NA	NA	NA
2.7.1.106	glucose-1,6-bisphosphate_synthase;	0	NA	NA	NA
2.7.1.108	dolichol_kinase;	0	NA	NA	NA
2.7.1.127	inositol-trisphosphate_3-kinase;	0	NA	NA	NA
2.7.1.130	tetraacyldisaccharide_4-kinase;	0	NA	NA	NA
2.7.1.134	inositol-tetrakisphosphate_1-kinase;	0	NA	NA	NA
2.7.1.137	phosphatidylinositol_3-kinase;	0	NA	NA	NA
2.7.1.138	ceramide_kinase;	0	NA	NA	NA
2.7.1.14	sedoheptulokinase;	0	NA	NA	NA
2.7.1.140	inositol-tetrakisphosphate_5-kinase;	0	NA	NA	NA
2.7.1.148	4-(cytidine_5-diphospho)-2-C-methyl-D-erythritol_kinase;	0	NA	NA	NA
2.7.1.149	1-phosphatidylinositol-5-phosphate_4-kinase;	0	NA	NA	NA
2.7.1.150	1-phosphatidylinositol-3-phosphate_5-kinase;	0	NA	NA	NA
2.7.1.151	inositol-polyphosphate_multikinase;	0	NA	NA	NA
2.7.1.153	phosphatidylinositol-4,5-bisphosphate_3-kinase;	0	NA	NA	NA
2.7.1.154	phosphatidylinositol-4-phosphate_3-kinase;	0	NA	NA	NA
2.7.1.156	adenosylcobinamide_kinase;	0	NA	NA	NA
2.7.1.22	ribosylnicotinamide_kinase;	0	NA	NA	NA
2.7.1.28	triokinase;	0	NA	NA	NA
2.7.1.32	choline_kinase;	0	NA	NA	NA
2.7.1.34	pantetheine_kinase;	0	NA	NA	NA
2.7.1.35	pyridoxal_kinase;	0	NA	NA	NA
2.7.1.36	mevalonate_kinase;	0	NA	NA	NA
2.7.1.43	glucuronokinase;	0	NA	NA	NA
2.7.1.44	galacturonokinase;	0	NA	NA	NA
2.7.1.46	L-arabinokinase;	0	NA	NA	NA
2.7.1.52	fucokinase;	0	NA	NA	NA
2.7.1.64	inositol_3-kinase;	0	NA	NA	NA
2.7.1.65	scyllo-inosamine_4-kinase;	0	NA	NA	NA
2.7.1.66	undecaprenol_kinase;	0	NA	NA	NA
2.7.1.67	1-phosphatidylinositol_4-kinase;	0	NA	NA	NA
2.7.1.68	1-phosphatidylinositol-4-phosphate_5-kinase;	0	NA	NA	NA
2.7.1.72	streptomycin_6-kinase;	0	NA	NA	NA
2.7.1.8	glucosamine_kinase;	0	NA	NA	NA
2.7.1.81	hydroxylysine_kinase;	0	NA	NA	NA
2.7.1.83	pseudouridine_kinase;	0	NA	NA	NA
2.7.1.91	sphinganine_kinase;	0	NA	NA	NA
2.7.1.93	alkylglycerol_kinase;	0	NA	NA	NA
2.7.1.94	acylglycerol_kinase;	0	NA	NA	NA
2.7.2.12	acetate_kinase_(diphosphate);	0	NA	NA	NA
2.7.2.6	formate_kinase	0	NA	NA	NA
2.7.3.1	guanidinoacetate_kinase;	0	NA	NA	NA
2.7.3.2	creatine_kinase;	0	NA	NA	NA
2.7.3.3	arginine_kinase;	0	NA	NA	NA
2.7.3.4	taurocyamine_kinase;	0	NA	NA	NA
2.7.3.5	lombricine_kinase	0	NA	NA	NA
2.7.4.11	(deoxy)adenylate_kinase	0	NA	NA	NA
2.7.4.15	thiamine-diphosphate_kinase;	0	NA	NA	NA
2.7.4.2	phosphomevalonate_kinase;	0	NA	NA	NA
2.7.4.4	nucleoside-phosphate_kinase;	0	NA	NA	NA
2.7.7.11	UTP---xylose-1-phosphate_uridylyltransferase;	0	NA	NA	NA
2.7.7.14	ethanolamine-phosphate_cytidylyltransferase;	0	NA	NA	NA
2.7.7.15	choline-phosphate_cytidylyltransferase;	0	NA	NA	NA
2.7.7.30	fucose-1-phosphate_guanylyltransferase;	0	NA	NA	NA
2.7.7.32	galactose-1-phosphate_thymidylyltransferase;	0	NA	NA	NA
2.7.7.34	glucose-1-phosphate_guanylyltransferase;	0	NA	NA	NA
2.7.7.37	aldose-1-phosphate_nucleotidyltransferase;	0	NA	NA	NA
2.7.7.38	3-deoxy-manno-octulosonate_cytidylyltransferase;	0	NA	NA	NA
2.7.7.39	glycerol-3-phosphate_cytidylyltransferase;	0	NA	NA	NA
2.7.7.40	D-ribitol-5-phosphate_cytidylyltransferase;	0	NA	NA	NA
2.7.7.44	glucuronate-1-phosphate_uridylyltransferase;	0	NA	NA	NA
2.7.7.5	sulfate_adenylyltransferase_(ADP);	0	NA	NA	NA
2.7.7.60	2-C-methyl-D-erythritol_4-phosphate_cytidylyltransferase;	0	NA	NA	NA
2.7.7.62	adenosylcobinamide-phosphate_guanylyltransferase;	0	NA	NA	NA
2.7.7.63	lipoate---protein_ligase;	0	NA	NA	NA
2.7.8.1	ethanolaminephosphotransferase;	0	NA	NA	NA
2.7.8.10	sphingosine_cholinephosphotransferase;	0	NA	NA	NA
2.7.8.11	CDP-diacylglycerol---inositol_3-phosphatidyltransferase;	0	NA	NA	NA
2.7.8.15	UDP-N-acetylglucosamine---dolichyl-phosphate	0	NA	NA	NA
2.7.8.2	diacylglycerol_cholinephosphotransferase;	0	NA	NA	NA
2.7.8.22	1-alkenyl-2-acylglycerol_choline_phosphotransferase;	0	NA	NA	NA
2.7.8.26	adenosylcobinamide-GDP_ribazoletransferase;	0	NA	NA	NA
2.7.8.3	ceramide_cholinephosphotransferase;	0	NA	NA	NA
2.7.8.4	serine-phosphoethanolamine_synthase;	0	NA	NA	NA
2.8.1.3	thiosulfate---thiol_sulfurtransferase;	0	NA	NA	NA
2.8.1.5	thiosulfate---dithiol_sulfurtransferase;	0	NA	NA	NA
2.8.1.7	cysteine_desulfurase;	0	NA	NA	NA
2.8.1.8	lipoyl_synthase;	0	NA	NA	NA
2.8.2.-	no_name	0	NA	NA	NA
2.8.2.11	galactosylceramide_sulfotransferase;	0	NA	NA	NA
2.8.2.15	steroid_sulfotransferase;	0	NA	NA	NA
2.8.2.3	amine_sulfotransferase;	0	NA	NA	NA
2.8.2.4	estrone_sulfotransferase;	0	NA	NA	NA
2.8.2.5	chondroitin_4-sulfotransferase;	0	NA	NA	NA
2.8.2.6	choline_sulfotransferase;	0	NA	NA	NA
2.8.3.11	citramalate_CoA-transferase	0	NA	NA	NA
2.8.3.2	oxalate_CoA-transferase;	0	NA	NA	NA
2.8.3.3	malonate_CoA-transferase;	0	NA	NA	NA
2.8.3.7	succinate---citramalate_CoA-transferase;	0	NA	NA	NA
2.8.4.1	coenzyme-B_sulfoethylthiotransferase;	0	NA	NA	NA
2.9.1.1	L-seryl-tRNASec_selenium_transferase;	0	NA	NA	NA
3.1.1.1	carboxylesterase;	0	NA	NA	NA
3.1.1.13	sterol_esterase;	0	NA	NA	NA
3.1.1.14	chlorophyllase;	0	NA	NA	NA
3.1.1.15	L-arabinonolactonase	0	NA	NA	NA
3.1.1.19	uronolactonase;	0	NA	NA	NA
3.1.1.2	arylesterase;	0	NA	NA	NA
3.1.1.21	retinyl-palmitate_esterase;	0	NA	NA	NA
3.1.1.25	1,4-lactonase;	0	NA	NA	NA
3.1.1.26	galactolipase;	0	NA	NA	NA
3.1.1.27	4-pyridoxolactonase	0	NA	NA	NA
3.1.1.34	lipoprotein_lipase;	0	NA	NA	NA
3.1.1.35	dihydrocoumarin_hydrolase	0	NA	NA	NA
3.1.1.41	cephalosporin-C_deacetylase;	0	NA	NA	NA
3.1.1.47	1-alkyl-2-acetylglycerophosphocholine_esterase;	0	NA	NA	NA
3.1.1.49	sinapine_esterase;	0	NA	NA	NA
3.1.1.63	11-cis-retinyl-palmitate_hydrolase;	0	NA	NA	NA
3.1.1.64	all-trans-retinyl-palmitate_hydrolase	0	NA	NA	NA
3.1.1.65	L-rhamnono-1,4-lactonase;	0	NA	NA	NA
3.1.1.68	xylono-1,4-lactonase;	0	NA	NA	NA
3.1.1.7	acetylcholinesterase;	0	NA	NA	NA
3.1.1.78	polyneuridine-aldehyde_esterase;	0	NA	NA	NA
3.1.2.10	formyl-CoA_hydrolase;	0	NA	NA	NA
3.1.2.11	acetoacetyl-CoA_hydrolase;	0	NA	NA	NA
3.1.2.17	(S)-methylmalonyl-CoA_hydrolase;	0	NA	NA	NA
3.1.2.22	palmitoyl[protein]_hydrolase;	0	NA	NA	NA
3.1.2.3	succinyl-CoA_hydrolase;	0	NA	NA	NA
3.1.3.13	bisphosphoglycerate_phosphatase;	0	NA	NA	NA
3.1.3.21	glycerol-1-phosphatase;	0	NA	NA	NA
3.1.3.22	mannitol-1-phosphatase;	0	NA	NA	NA
3.1.3.24	sucrose-phosphatase;	0	NA	NA	NA
3.1.3.26	4-phytase;	0	NA	NA	NA
3.1.3.36	phosphoinositide_5-phosphatase;	0	NA	NA	NA
3.1.3.38	3-phosphoglycerate_phosphatase;	0	NA	NA	NA
3.1.3.39	streptomycin-6-phosphatase;	0	NA	NA	NA
3.1.3.41	4-nitrophenylphosphatase;	0	NA	NA	NA
3.1.3.45	3-deoxy-manno-octulosonate-8-phosphatase	0	NA	NA	NA
3.1.3.51	dolichyl-phosphatase;	0	NA	NA	NA
3.1.3.54	fructose-2,6-bisphosphate_6-phosphatase;	0	NA	NA	NA
3.1.3.56	inositol-polyphosphate_5-phosphatase;	0	NA	NA	NA
3.1.3.57	inositol-1,4-bisphosphate_1-phosphatase;	0	NA	NA	NA
3.1.3.59	alkylacetylglycerophosphatase;	0	NA	NA	NA
3.1.3.62	multiple_inositol-polyphosphate_phosphatase;	0	NA	NA	NA
3.1.3.64	phosphatidylinositol-3-phosphatase;	0	NA	NA	NA
3.1.3.66	phosphatidylinositol-3,4-bisphosphate_4-phosphatase;	0	NA	NA	NA
3.1.3.67	phosphatidylinositol-3,4,5-trisphosphate_3-phosphatase;	0	NA	NA	NA
3.1.3.73	alpha-ribazole_phosphatase;	0	NA	NA	NA
3.1.3.74	pyridoxal_phosphatase;	0	NA	NA	NA
3.1.3.75	phosphoethanolamine/phosphocholine_phosphatase;	0	NA	NA	NA
3.1.3.8	3-phytase;	0	NA	NA	NA
3.1.3.9	glucose-6-phosphatase;	0	NA	NA	NA
3.1.4.11	phosphoinositide_phospholipase_C;	0	NA	NA	NA
3.1.4.12	sphingomyelin_phosphodiesterase;	0	NA	NA	NA
3.1.4.13	serine-ethanolaminephosphate_phosphodiesterase;	0	NA	NA	NA
3.1.4.2	glycerophosphocholine_phosphodiesterase;	0	NA	NA	NA
3.1.4.39	alkylglycerophosphoethanolamine_phosphodiesterase;	0	NA	NA	NA
3.1.4.41	sphingomyelin_phosphodiesterase_D;	0	NA	NA	NA
3.1.4.48	dolichylphosphate-glucose_phosphodiesterase;	0	NA	NA	NA
3.1.4.50	glycosylphosphatidylinositol_phospholipase_D;	0	NA	NA	NA
3.1.6.1	arylsulfatase;	0	NA	NA	NA
3.1.6.12	N-acetylgalactosamine-4-sulfatase;	0	NA	NA	NA
3.1.6.13	iduronate-2-sulfatase;	0	NA	NA	NA
3.1.6.14	N-acetylglucosamine-6-sulfatase;	0	NA	NA	NA
3.1.6.18	glucuronate-2-sulfatase;	0	NA	NA	NA
3.1.6.2	steryl-sulfatase;	0	NA	NA	NA
3.1.6.3	glycosulfatase;	0	NA	NA	NA
3.1.6.4	N-acetylgalactosamine-6-sulfatase;	0	NA	NA	NA
3.1.6.8	cerebroside-sulfatase;	0	NA	NA	NA
3.1.8.1	aryldialkylphosphatase;	0	NA	NA	NA
3.10.1.1	N-sulfoglucosamine_sulfohydrolase;	0	NA	NA	NA
3.10.1.2	cyclamate_sulfohydrolase;	0	NA	NA	NA
3.12.1.1	trithionate_hydrolase	0	NA	NA	NA
3.13.1.1	UDP-sulfoquinovose_synthase;	0	NA	NA	NA
3.2.1.103	keratan-sulfate_endo-1,4-beta-galactosidase;	0	NA	NA	NA
3.2.1.105	3alpha(S)-strictosidine_beta-glucosidase	0	NA	NA	NA
3.2.1.106	mannosyl-oligosaccharide_glucosidase;	0	NA	NA	NA
3.2.1.108	lactase;	0	NA	NA	NA
3.2.1.113	mannosyl-oligosaccharide_1,2-alpha-mannosidase;	0	NA	NA	NA
3.2.1.114	mannosyl-oligosaccharide_1,3-1,6-alpha-mannosidase;	0	NA	NA	NA
3.2.1.125	raucaffricine_beta-glucosidase;	0	NA	NA	NA
3.2.1.126	coniferin_beta-glucosidase;	0	NA	NA	NA
3.2.1.137	mannan_exo-1,2-1,6-alpha-mannosidase;	0	NA	NA	NA
3.2.1.147	thioglucosidase;	0	NA	NA	NA
3.2.1.18	exo-alpha-sialidase;	0	NA	NA	NA
3.2.1.2	beta-amylase;	0	NA	NA	NA
3.2.1.35	hyaluronoglucosaminidase;	0	NA	NA	NA
3.2.1.45	glucosylceramidase;	0	NA	NA	NA
3.2.1.46	galactosylceramidase;	0	NA	NA	NA
3.2.1.48	sucrose_alpha-glucosidase;	0	NA	NA	NA
3.2.1.49	alpha-N-acetylgalactosaminidase;	0	NA	NA	NA
3.2.1.50	alpha-N-acetylglucosaminidase;	0	NA	NA	NA
3.2.1.54	cyclomaltodextrinase;	0	NA	NA	NA
3.2.1.67	galacturan_1,4-alpha-galacturonidase;	0	NA	NA	NA
3.2.1.76	L-iduronidase;	0	NA	NA	NA
3.2.1.77	mannan_1,2-(1,3)-alpha-mannosidase;	0	NA	NA	NA
3.2.1.84	glucan_1,3-alpha-glucosidase;	0	NA	NA	NA
3.2.2.10	pyrimidine-5-nucleotide_nucleosidase;	0	NA	NA	NA
3.2.2.12	inosinate_nucleosidase	0	NA	NA	NA
3.2.2.14	NMN_nucleosidase;	0	NA	NA	NA
3.2.2.2	inosine_nucleosidase;	0	NA	NA	NA
3.2.2.25	N-methyl_nucleosidase;	0	NA	NA	NA
3.2.2.5	NAD+_nucleosidase;	0	NA	NA	NA
3.2.2.6	NAD(P)+_nucleosidase;	0	NA	NA	NA
3.2.2.7	adenosine_nucleosidase;	0	NA	NA	NA
3.3.2.-	no_name	0	NA	NA	NA
3.3.2.1	isochorismatase;	0	NA	NA	NA
3.3.2.10	soluble_epoxide_hydrolase;	0	NA	NA	NA
3.3.2.2	alkenylglycerophosphocholine_hydrolase;	0	NA	NA	NA
3.3.2.4	trans-epoxysuccinate_hydrolase;	0	NA	NA	NA
3.3.2.5	alkenylglycerophosphoethanolamine_hydrolase	0	NA	NA	NA
3.3.2.6	leukotriene-A4_hydrolase;	0	NA	NA	NA
3.3.2.7	hepoxilin-epoxide_hydrolase;	0	NA	NA	NA
3.3.2.8	limonene-1,2-epoxide_hydrolase;	0	NA	NA	NA
3.3.2.9	microsomal_epoxide_hydrolase;	0	NA	NA	NA
3.4.-.-	no_name	0	NA	NA	NA
3.4.13.12	Met-Xaa_dipeptidase;	0	NA	NA	NA
3.4.13.20	beta-Ala-His_dipeptidase;	0	NA	NA	NA
[truncated: 284 more rows]
