# Supplementary material for: Decoupling Environment-Dependent and Independent Genetic Robustness across Bacterial Species
Source: PLoS Comput Biol. 2010 Feb 26;6(2):e1000690. doi: 10.1371/journal.pcbi.1000690 (PMC2829043; doi:10.1371/journal.pcbi.1000690)
Supplement: Table S5 — List of human commensal and pathogens and the distribution and essentiality of Methenyltetrahydrofolate cyclohydrolase (EC 3.5.4.9) and Formyltetrahydrofolate synthetase (6.3.4.3) across these species. (0.03 MB XLS) [file pcbi.1000690.s006.xls]

## Sheet: Sheet 1
KEGG	Full names	Pathogen or Commensal	Robustness score EC 3.5.4.9	Robustness score EC 6.3.4.3
bad	Bifidobacterium adolescentis	Commensal	1	1
bfs	Bacteroides fragilis NCTC9343	Commensal	1	1
blo	Bifidobacterium longum	Commensal	1	1
bth	Bacteroides thetaiotaomicron	Commensal	1	1
ljo	Lactobacillus johnsonii	Commensal	1	1
lpl	Lactobacillus plantarum	Commensal	1	1
lsl	Lactobacillus salivarius	Commensal	1	1
bbu	Borrelia burgdorferi	Pathogen	---	---
bhe	Bartonella henselae	Pathogen	0	---
bma	Burkholderia mallei ATCC 23344	Pathogen	0	---
bme	Brucella melitensis	Pathogen	0	---
bmf	Brucella melitensis biovar Abortus	Pathogen	0	---
bml	Burkholderia mallei NCTC 10229	Pathogen	---	---
bmn	Burkholderia mallei NCTC 10247	Pathogen	0	---
bms	Brucella suis	Pathogen	0	---
bmv	Burkholderia mallei SAVP1	Pathogen	---	---
bpe	Bordetella pertussis	Pathogen	0	---
cpa	Chlamydophila pneumoniae AR39	Pathogen	0	---
cpj	Chlamydophila pneumoniae J138	Pathogen	0	---
cpn	Chlamydophila pneumoniae CWL029	Pathogen	0	---
cpt	Chlamydophila pneumoniae TW183	Pathogen	0	---
cta	Chlamydia trachomatis serovar A	Pathogen	0	---
ctr	Chlamydia trachomatis serovar D	Pathogen	0	---
dno	Dichelobacter nodosus	Pathogen	0	---
ecc	Escherichia coli CFT073 (UPEC)	Pathogen	0	---
ece	Escherichia coli O157 EDL933 (EHEC)	Pathogen	0	---
eci	Escherichia coli UTI89 (UPEC)	Pathogen	1	1
ecp	Escherichia coli 536 (UPEC)	Pathogen	0	---
ecs	Escherichia coli O157 Sakai (EHEC)	Pathogen	0	---
hin	Haemophilus influenzae (serotype d)	Pathogen	0	---
hip	Haemophilus influenzae PittEE	Pathogen	---	---
hiq	Haemophilus influenzae PittGG	Pathogen	---	---
hit	Haemophilus influenzae 86-028NP (nontypeable)	Pathogen	0	---
hpa	Helicobacter pylori HPAG1	Pathogen	0	---
hpj	Helicobacter pylori J99	Pathogen	---	---
hpy	Helicobacter pylori 26695	Pathogen	---	---
hso	Haemophilus somnus	Pathogen	0	---
lic	Leptospira interrogans serovar Copenhageni	Pathogen	0	---
lil	Leptospira interrogans serovar lai	Pathogen	0	---
lpf	Legionella pneumophila Lens	Pathogen	0	---
lpn	Legionella pneumophila Philadelphia 1	Pathogen	0	---
lpp	Legionella pneumophila Paris	Pathogen	0	---
mga	Mycoplasma gallisepticum	Pathogen	1	---
mle	Mycobacterium leprae	Pathogen	0	---
mpu	Mycoplasma pulmonis	Pathogen	1	---
mra	Mycobacterium tuberculosis H37Ra	Pathogen	0	---
mtc	Mycobacterium tuberculosis CDC1551	Pathogen	0	---
mtf	Mycobacterium tuberculosis F11	Pathogen	---	---
mtu	Mycobacterium tuberculosis H37Rv	Pathogen	0	---
rrj	Rickettsia rickettsii Iowa	Pathogen	0	---
rsa	Renibacterium salmoninarum	Pathogen	---	0
saa	Staphylococcus aureus USA300	Pathogen	---	0
sab	Staphylococcus aureus RF122	Pathogen	1	1
sac	Staphylococcus aureus COL	Pathogen	1	1
sag	Streptococcus agalactiae 2603 (serotype V)	Pathogen	1	1
sah	Staphylococcus aureus JH1	Pathogen	---	0
saj	Staphylococcus aureus JH9	Pathogen	---	0
sak	Streptococcus agalactiae A909 (serotype Ia)	Pathogen	1	1
sam	Staphylococcus aureus MW2	Pathogen	1	1
san	Streptococcus agalactiae NEM316 (serotype III)	Pathogen	1	1
sao	Staphylococcus aureus NCTC8325	Pathogen	1	1
sar	Staphylococcus aureus MRSA252	Pathogen	1	1
sas	Staphylococcus aureus MSSA476	Pathogen	1	1
sau	Staphylococcus aureus N315	Pathogen	1	1
sav	Staphylococcus aureus Mu50	Pathogen	1	1
sax	Staphylococcus aureus USA300 TCH1516	Pathogen	1	1
sbo	Shigella boydii	Pathogen	0	---
sdy	Shigella dysenteriae	Pathogen	0	---
sec	Salmonella enterica serovar Choleraesuis	Pathogen	0	---
sep	Staphylococcus epidermidis ATCC 12228	Pathogen	1	1
ser	Staphylococcus epidermidis RP62A	Pathogen	1	1
sfl	Shigella flexneri 301 (serotype 2a)	Pathogen	0	---
sfv	Shigella flexneri 8401 (serotype 5b)	Pathogen	0	---
sfx	Shigella flexneri 2457T (serotype 2a)	Pathogen	0	---
spa	Streptococcus pyogenes MGAS10394 (serotype M6)	Pathogen	1	1
spb	Streptococcus pyogenes MGAS6180 (serotype M28)	Pathogen	1	1
spf	Streptococcus pyogenes Manfredo (serotype M5)	Pathogen	1	1
spg	Streptococcus pyogenes MGAS315 (serotype M3)	Pathogen	1	1
sph	Streptococcus pyogenes MGAS10270 (serotype M3)	Pathogen	1	1
spi	Streptococcus pyogenes MGAS10750 (serotype M3)	Pathogen	1	1
spj	Streptococcus pyogenes MGAS2096 (serotype M3)	Pathogen	1	1
spk	Streptococcus pyogenes MGAS9429 (serotype M3)	Pathogen	1	1
spm	Streptococcus pyogenes MGAS8232 (serotype M18)	Pathogen	1	1
sps	Streptococcus pyogenes SSI-1 (serotype M3)	Pathogen	1	1
spt	Salmonella enterica serovar Paratyphi A	Pathogen	0	---
spy	Streptococcus pyogenes SF370 (serotype M1)	Pathogen	1	1
spz	Streptococcus pyogenes MGAS5005 (serotype M1)	Pathogen	1	1
ssn	Shigella sonnei	Pathogen	0	---
stm	Salmonella typhimurium LT2	Pathogen	0	---
stt	Salmonella enterica serovar Typhi Ty2	Pathogen	0	---
sty	Salmonella enterica serovar Typhi CT18	Pathogen	0	---
tde	Treponema denticola	Pathogen	1	1
uur	Ureaplasma urealyticum	Pathogen	---	---
